# Supplementary material for: Subjective Well-being: A Key to Bridge Urbanization, Brain and Mental Health
Source: Research Square preprint supplement (doi:10.21203/rs.3.rs-5794364/v1), 2025-02-10
Supplement: Supplementary file 1 [file 3df01fedf12926328c3d5caf.xlsx]

## Sheet: Supplementary Table 1
Supplementary Table 1: Details of five SWB Questionaries in UK biobank.
Field	Description	Question	Answers
4526	Happiness	In general how happy are you?	1 : Extremely happy 2 : Very happy 3 : Moderately happy 4 : Moderately unhappy 5 : Very unhappy 6 : Extremely unhappy -1 : Do not know -3 : Prefer not to answer
4548	Health satisfaction	In general how satisfied are you with your HEALTH?	1 : Extremely happy 2 : Very happy 3 : Moderately happy 4 : Moderately unhappy 5 : Very unhappy 6 : Extremely unhappy -1 : Do not know -3 : Prefer not to answer
4559	Family relationship satisfaction	In general how satisfied are you with your FAMILY RELATIONSHIPS?	1 : Extremely happy 2 : Very happy 3 : Moderately happy 4 : Moderately unhappy 5 : Very unhappy 6 : Extremely unhappy -1 : Do not know -3 : Prefer not to answer
4570	Friendships satisfaction	In general how satisfied are you with your FRIENDSHIPS?	1 : Extremely happy 2 : Very happy 3 : Moderately happy 4 : Moderately unhappy 5 : Very unhappy 6 : Extremely unhappy -1 : Do not know -3 : Prefer not to answer
4581	Financial situation satisfaction	In general how satisfied are you with your FINANCIAL SITUATION?	1 : Extremely happy 2 : Very happy 3 : Moderately happy 4 : Moderately unhappy 5 : Very unhappy 6 : Extremely unhappy -1 : Do not know -3 : Prefer not to answer

## Sheet: Supplementary Table 2
Supplementary Table 2: Details of 125 urban living environmental factors.
Num	Catergory	Field and Factor Name
1	Traffic	24009_Traffic_intensity_on_the_nearest_road
2		24010_Inverse_distance_to_the_nearest_road
3		24011_Traffic_intensity_on_the_nearest_major_road
4		24012_Inverse_distance_to_the_nearest_major_road
5		24013_Total_traffic_load_on_major_roads
6		24014_Close_to_major_road
7		24015_Sum_of_road_length_of_major_roads_within_100m
8	Air pollution	24003_Nitrogen_dioxide_air_pollution_2010
9		24004_Nitrogen_oxides_air_pollution_2010
10		24005_Particulate_matter_air_pollution_pm10_2010
11		24006_Particulate_matter_air_pollution_pm2.5_2010
12		24007_Particulate_matter_air_pollution_pm2.5_absorbance_2010
13		24008_Particulate_matter_air_pollution_pm2.5_10um_2010
14	Sound pollution	24020_Average_daytime_sound_level_of_noise_pollution
19	Building Class	Building_Class_code
20	Destination Accessibility	ND_CC04_Public_Village_Hall_Other_Community_Facility
21		ND_CL03_Library
22		ND_CL07_Cinema_Conf_Exhib_Centre_Theatre_Concert_Hall
23		ND_ZW_Places_of_Worship
24		ND_CE01_College
25		ND_CE02_Childrens_Nursery_Creche
26		ND_CE03_Preparatory_First_Primary_Infant_Junior_M
27		ND_CE04_Secondary_High_School
28		ND_CE05_University
29		ND_CI01_Factory_Manufacturing
30		ND_CI02_Mineral_Ore_Working_Quarry_Mine
31		ND_CI03_Workshop_Light_Industrial
32		ND_CI04_Warehouse_Store_Storage_Depot
33		ND_CM01_Dentist
34		ND_CM02_GP_Practice_Surgery_Clinic
35		ND_CM03_Hospital_Hospice
36		ND_CC12_Job_Centre
37		ND_CO01GV_Central_Government_Service
38		ND_CO01LG_Local_Government_Service
39		ND_CR01_Bank_Financial_Service
40		ND_CR02_Retail_Service_Agent
41		ND_CR02PO_Post_Office
42		ND_CU02_Landfill
43		ND_CU03_Power_Station_Energy_Production
44		ND_CU07_Water_Waste_Water_Sewage_Treatment_Works
45		ND_Recycling
46		ND_CT03_ Car/Coach/Commercial Vehicle/Taxi/Parking/Park and Ride Site
47		ND_CX01_Police_Transport_Police_Station
48		ND_CX02_Fire_Station
49		ND_CX03_Ambulance_Station
50		ND_CR06_Public_House_Bar_Night_Club
51		ND_CR07_Restaurant_Cafeteria
52		ND_CR10_Fast_Food_Outlet_Takeaway
53	Index of Multiple Deprivation(IMD)	26410_Index of Multiple Deprivation (England)
		26427_Index of Multiple Deprivation (Scotland)
		26426_Index of Multiple Deprivation (Wales)
54	LandUse Density	Den_CA01_Farm_Non_Residential_Associated_Building
55		Den_CB
56		Den_CC_Community Services
57		Den_CE_Education
58		Den_CH_Hotel / Motel /Boarding /Guest House
59		Den_CI01_Factory_Manufacturing
60		Den_CI02_Mineral /Ore Working/Quarry/Mine
61		Den_CI03_Workshop_Light_Industrial
62		Den_CI04_Warehouse_Store_Storage_Depot
63		Den_CI05_Wholesale Distribution
64		Den_CI06_Recycling Plant
65		Den_CI07_Incinerator/Waste Transfer Station
66		Den_CI08_Maintenance Depot
67		Den_CL02_Holiday / Campsite
68		Den_CL03_Library
69		Den_CL04_Museum_Gallery
70		Den_CL06_Indoor_Outdoor_Leisure_Sporting_Activity_Centre
71		Den_CL07_Cinema_Conference_Exhib_Centre_Theatre_Concert_Hall
72		Den_CL10_Licensed_Private_Members_Club_Recreational_Social_Club
73		Den_CM_Medical
74		Den_CN_Animal Centre
75		Den_CO01_Office / Work Studio
76		Den_CR01_Bank / Financial Service
77		Den_CR02_Retail Service Agent
78		Den_CR04_Market (Indoor /Outdoor)
79		Den_CR05_Petrol Filling Station
80		Den_CR06_Public_House_Bar_Nightclub
81		Den_CR07_Restaurant_Cafeteria
82		Den_CR08_Shop / Showroom
83		Den_CR09_Other_Licensed_Premise_Vendor
84		Den_CR10_Fast_Food_Outlet_Takeaway_Hot_Cold
85		Den_CR11_Automated_Teller_Machine_ATM
86		Den_CS_Storage Land
87		Den_CT
88		Den_CU
89		Den_CX
90		Den_CZ
91		Den_LL_Allotment
92		Den_LM
93		Den_LO
94		Den_LP
95		Den_LU
96		Den_LW
97		Den_M_Military
98		Den_R_Residential
99		Den_Z_Object_of_Interest
100	Normalized Difference Vegetation Index(NDVI)	NDVI_500m_mean
101	Street network Accessibility	Link_Connectivity
102		Link_Length
103		Link_Ang_Curvature
104		Mean_Ang_Dist_Wl_R400c
105		NetQuantPD_Ang_Wl_R400c
106		Betweenness_Ang_Wl_R400c
107		TPBetweenness_Ang_Wl_R400c
108		TPDestination_Ang_Wl_R400c
109		Links_R400c
110		Length_R400c
111		Ang_Dist_R400c
112		MeanGeoLen_Ang_Wl_R400c
113		Mean_Crow_Flight_Wl_R400c
114		Diversion_Ratio_Ang_Wl_R400c
115		Convex_Hull_Area_R400c
116		Convex_Hull_Perimeter_R400c
117		Convex_Hull_Max_Radius_R400c
118		Convex_Hull_Bearing_R400c
119		Convex_Hull_Shape_Index_R400c
120	Terrain	Slope500m_Mean
121	Greenspace proximity	Greenspace_percentage_buffer_300m
122		Domestic_garden_percentage_buffer_300m
123		Natural_environment_percentage_buffer_300m
124	Coast proximity	Distance_Euclidean_to_coast
125	Water proximity	Water_percentage_buffer_300m

## Sheet: Supplementary Table 3
Supplementary Table 3: rfMRI full correlation matrix, dimension 100 in UK biobank
Imaging	vector_net	D’ nodes	D’ nodes
rfMRI	ICA1	2	3
rfMRI	ICA2	2	4
rfMRI	ICA3	3	4
rfMRI	ICA4	2	5
rfMRI	ICA5	3	5
rfMRI	ICA6	4	5
rfMRI	ICA7	2	6
rfMRI	ICA8	3	6
rfMRI	ICA9	4	6
rfMRI	ICA10	5	6
rfMRI	ICA11	2	7
rfMRI	ICA12	3	7
rfMRI	ICA13	4	7
rfMRI	ICA14	5	7
rfMRI	ICA15	6	7
rfMRI	ICA16	2	8
rfMRI	ICA17	3	8
rfMRI	ICA18	4	8
rfMRI	ICA19	5	8
rfMRI	ICA20	6	8
rfMRI	ICA21	7	8
rfMRI	ICA22	2	9
rfMRI	ICA23	3	9
rfMRI	ICA24	4	9
rfMRI	ICA25	5	9
rfMRI	ICA26	6	9
rfMRI	ICA27	7	9
rfMRI	ICA28	8	9
rfMRI	ICA29	2	10
rfMRI	ICA30	3	10
rfMRI	ICA31	4	10
rfMRI	ICA32	5	10
rfMRI	ICA33	6	10
rfMRI	ICA34	7	10
rfMRI	ICA35	8	10
rfMRI	ICA36	9	10
rfMRI	ICA37	2	11
rfMRI	ICA38	3	11
rfMRI	ICA39	4	11
rfMRI	ICA40	5	11
rfMRI	ICA41	6	11
rfMRI	ICA42	7	11
rfMRI	ICA43	8	11
rfMRI	ICA44	9	11
rfMRI	ICA45	10	11
rfMRI	ICA46	2	12
rfMRI	ICA47	3	12
rfMRI	ICA48	4	12
rfMRI	ICA49	5	12
rfMRI	ICA50	6	12
rfMRI	ICA51	7	12
rfMRI	ICA52	8	12
rfMRI	ICA53	9	12
rfMRI	ICA54	10	12
rfMRI	ICA55	11	12
rfMRI	ICA56	2	13
rfMRI	ICA57	3	13
rfMRI	ICA58	4	13
rfMRI	ICA59	5	13
rfMRI	ICA60	6	13
rfMRI	ICA61	7	13
rfMRI	ICA62	8	13
rfMRI	ICA63	9	13
rfMRI	ICA64	10	13
rfMRI	ICA65	11	13
rfMRI	ICA66	12	13
rfMRI	ICA67	2	14
rfMRI	ICA68	3	14
rfMRI	ICA69	4	14
rfMRI	ICA70	5	14
rfMRI	ICA71	6	14
rfMRI	ICA72	7	14
rfMRI	ICA73	8	14
rfMRI	ICA74	9	14
rfMRI	ICA75	10	14
rfMRI	ICA76	11	14
rfMRI	ICA77	12	14
rfMRI	ICA78	13	14
rfMRI	ICA79	2	15
rfMRI	ICA80	3	15
rfMRI	ICA81	4	15
rfMRI	ICA82	5	15
rfMRI	ICA83	6	15
rfMRI	ICA84	7	15
rfMRI	ICA85	8	15
rfMRI	ICA86	9	15
rfMRI	ICA87	10	15
rfMRI	ICA88	11	15
rfMRI	ICA89	12	15
rfMRI	ICA90	13	15
rfMRI	ICA91	14	15
rfMRI	ICA92	2	16
rfMRI	ICA93	3	16
rfMRI	ICA94	4	16
rfMRI	ICA95	5	16
rfMRI	ICA96	6	16
rfMRI	ICA97	7	16
rfMRI	ICA98	8	16
rfMRI	ICA99	9	16
rfMRI	ICA100	10	16
rfMRI	ICA101	11	16
rfMRI	ICA102	12	16
rfMRI	ICA103	13	16
rfMRI	ICA104	14	16
rfMRI	ICA105	15	16
rfMRI	ICA106	2	17
rfMRI	ICA107	3	17
rfMRI	ICA108	4	17
rfMRI	ICA109	5	17
rfMRI	ICA110	6	17
rfMRI	ICA111	7	17
rfMRI	ICA112	8	17
rfMRI	ICA113	9	17
rfMRI	ICA114	10	17
rfMRI	ICA115	11	17
rfMRI	ICA116	12	17
rfMRI	ICA117	13	17
rfMRI	ICA118	14	17
rfMRI	ICA119	15	17
rfMRI	ICA120	16	17
rfMRI	ICA121	2	18
rfMRI	ICA122	3	18
rfMRI	ICA123	4	18
rfMRI	ICA124	5	18
rfMRI	ICA125	6	18
rfMRI	ICA126	7	18
rfMRI	ICA127	8	18
rfMRI	ICA128	9	18
rfMRI	ICA129	10	18
rfMRI	ICA130	11	18
rfMRI	ICA131	12	18
rfMRI	ICA132	13	18
rfMRI	ICA133	14	18
rfMRI	ICA134	15	18
rfMRI	ICA135	16	18
rfMRI	ICA136	17	18
rfMRI	ICA137	2	19
rfMRI	ICA138	3	19
rfMRI	ICA139	4	19
rfMRI	ICA140	5	19
rfMRI	ICA141	6	19
rfMRI	ICA142	7	19
rfMRI	ICA143	8	19
rfMRI	ICA144	9	19
rfMRI	ICA145	10	19
rfMRI	ICA146	11	19
rfMRI	ICA147	12	19
rfMRI	ICA148	13	19
rfMRI	ICA149	14	19
rfMRI	ICA150	15	19
rfMRI	ICA151	16	19
rfMRI	ICA152	17	19
rfMRI	ICA153	18	19
rfMRI	ICA154	2	20
rfMRI	ICA155	3	20
rfMRI	ICA156	4	20
rfMRI	ICA157	5	20
rfMRI	ICA158	6	20
rfMRI	ICA159	7	20
rfMRI	ICA160	8	20
rfMRI	ICA161	9	20
rfMRI	ICA162	10	20
rfMRI	ICA163	11	20
rfMRI	ICA164	12	20
rfMRI	ICA165	13	20
rfMRI	ICA166	14	20
rfMRI	ICA167	15	20
rfMRI	ICA168	16	20
rfMRI	ICA169	17	20
rfMRI	ICA170	18	20
rfMRI	ICA171	19	20
rfMRI	ICA172	2	21
rfMRI	ICA173	3	21
rfMRI	ICA174	4	21
rfMRI	ICA175	5	21
rfMRI	ICA176	6	21
rfMRI	ICA177	7	21
rfMRI	ICA178	8	21
rfMRI	ICA179	9	21
rfMRI	ICA180	10	21
rfMRI	ICA181	11	21
rfMRI	ICA182	12	21
rfMRI	ICA183	13	21
rfMRI	ICA184	14	21
rfMRI	ICA185	15	21
rfMRI	ICA186	16	21
rfMRI	ICA187	17	21
rfMRI	ICA188	18	21
rfMRI	ICA189	19	21
rfMRI	ICA190	20	21
rfMRI	ICA191	2	22
rfMRI	ICA192	3	22
rfMRI	ICA193	4	22
rfMRI	ICA194	5	22
rfMRI	ICA195	6	22
rfMRI	ICA196	7	22
rfMRI	ICA197	8	22
rfMRI	ICA198	9	22
rfMRI	ICA199	10	22
rfMRI	ICA200	11	22
rfMRI	ICA201	12	22
rfMRI	ICA202	13	22
rfMRI	ICA203	14	22
rfMRI	ICA204	15	22
rfMRI	ICA205	16	22
rfMRI	ICA206	17	22
rfMRI	ICA207	18	22
rfMRI	ICA208	19	22
rfMRI	ICA209	20	22
rfMRI	ICA210	21	22
rfMRI	ICA211	2	23
rfMRI	ICA212	3	23
rfMRI	ICA213	4	23
rfMRI	ICA214	5	23
rfMRI	ICA215	6	23
rfMRI	ICA216	7	23
rfMRI	ICA217	8	23
rfMRI	ICA218	9	23
rfMRI	ICA219	10	23
rfMRI	ICA220	11	23
rfMRI	ICA221	12	23
rfMRI	ICA222	13	23
rfMRI	ICA223	14	23
rfMRI	ICA224	15	23
rfMRI	ICA225	16	23
rfMRI	ICA226	17	23
rfMRI	ICA227	18	23
rfMRI	ICA228	19	23
rfMRI	ICA229	20	23
rfMRI	ICA230	21	23
rfMRI	ICA231	22	23
rfMRI	ICA232	2	24
rfMRI	ICA233	3	24
rfMRI	ICA234	4	24
rfMRI	ICA235	5	24
rfMRI	ICA236	6	24
rfMRI	ICA237	7	24
rfMRI	ICA238	8	24
rfMRI	ICA239	9	24
rfMRI	ICA240	10	24
rfMRI	ICA241	11	24
rfMRI	ICA242	12	24
rfMRI	ICA243	13	24
rfMRI	ICA244	14	24
rfMRI	ICA245	15	24
rfMRI	ICA246	16	24
rfMRI	ICA247	17	24
rfMRI	ICA248	18	24
rfMRI	ICA249	19	24
rfMRI	ICA250	20	24
rfMRI	ICA251	21	24
rfMRI	ICA252	22	24
rfMRI	ICA253	23	24
rfMRI	ICA254	2	25
rfMRI	ICA255	3	25
rfMRI	ICA256	4	25
rfMRI	ICA257	5	25
rfMRI	ICA258	6	25
rfMRI	ICA259	7	25
rfMRI	ICA260	8	25
rfMRI	ICA261	9	25
rfMRI	ICA262	10	25
rfMRI	ICA263	11	25
rfMRI	ICA264	12	25
rfMRI	ICA265	13	25
rfMRI	ICA266	14	25
rfMRI	ICA267	15	25
rfMRI	ICA268	16	25
rfMRI	ICA269	17	25
rfMRI	ICA270	18	25
rfMRI	ICA271	19	25
rfMRI	ICA272	20	25
rfMRI	ICA273	21	25
rfMRI	ICA274	22	25
rfMRI	ICA275	23	25
rfMRI	ICA276	24	25
rfMRI	ICA277	2	26
rfMRI	ICA278	3	26
rfMRI	ICA279	4	26
rfMRI	ICA280	5	26
rfMRI	ICA281	6	26
rfMRI	ICA282	7	26
rfMRI	ICA283	8	26
rfMRI	ICA284	9	26
rfMRI	ICA285	10	26
rfMRI	ICA286	11	26
rfMRI	ICA287	12	26
rfMRI	ICA288	13	26
rfMRI	ICA289	14	26
rfMRI	ICA290	15	26
rfMRI	ICA291	16	26
rfMRI	ICA292	17	26
rfMRI	ICA293	18	26
rfMRI	ICA294	19	26
rfMRI	ICA295	20	26
rfMRI	ICA296	21	26
rfMRI	ICA297	22	26
rfMRI	ICA298	23	26
rfMRI	ICA299	24	26
rfMRI	ICA300	25	26
rfMRI	ICA301	2	27
rfMRI	ICA302	3	27
rfMRI	ICA303	4	27
rfMRI	ICA304	5	27
rfMRI	ICA305	6	27
rfMRI	ICA306	7	27
rfMRI	ICA307	8	27
rfMRI	ICA308	9	27
rfMRI	ICA309	10	27
rfMRI	ICA310	11	27
rfMRI	ICA311	12	27
rfMRI	ICA312	13	27
rfMRI	ICA313	14	27
rfMRI	ICA314	15	27
rfMRI	ICA315	16	27
rfMRI	ICA316	17	27
rfMRI	ICA317	18	27
rfMRI	ICA318	19	27
rfMRI	ICA319	20	27
rfMRI	ICA320	21	27
rfMRI	ICA321	22	27
rfMRI	ICA322	23	27
rfMRI	ICA323	24	27
rfMRI	ICA324	25	27
rfMRI	ICA325	26	27
rfMRI	ICA326	2	28
rfMRI	ICA327	3	28
rfMRI	ICA328	4	28
rfMRI	ICA329	5	28
rfMRI	ICA330	6	28
rfMRI	ICA331	7	28
rfMRI	ICA332	8	28
rfMRI	ICA333	9	28
rfMRI	ICA334	10	28
rfMRI	ICA335	11	28
rfMRI	ICA336	12	28
rfMRI	ICA337	13	28
rfMRI	ICA338	14	28
rfMRI	ICA339	15	28
rfMRI	ICA340	16	28
rfMRI	ICA341	17	28
rfMRI	ICA342	18	28
rfMRI	ICA343	19	28
rfMRI	ICA344	20	28
rfMRI	ICA345	21	28
rfMRI	ICA346	22	28
rfMRI	ICA347	23	28
rfMRI	ICA348	24	28
rfMRI	ICA349	25	28
rfMRI	ICA350	26	28
rfMRI	ICA351	27	28
rfMRI	ICA352	2	29
rfMRI	ICA353	3	29
rfMRI	ICA354	4	29
rfMRI	ICA355	5	29
rfMRI	ICA356	6	29
rfMRI	ICA357	7	29
rfMRI	ICA358	8	29
rfMRI	ICA359	9	29
rfMRI	ICA360	10	29
rfMRI	ICA361	11	29
rfMRI	ICA362	12	29
rfMRI	ICA363	13	29
rfMRI	ICA364	14	29
rfMRI	ICA365	15	29
rfMRI	ICA366	16	29
rfMRI	ICA367	17	29
rfMRI	ICA368	18	29
rfMRI	ICA369	19	29
rfMRI	ICA370	20	29
rfMRI	ICA371	21	29
rfMRI	ICA372	22	29
rfMRI	ICA373	23	29
rfMRI	ICA374	24	29
rfMRI	ICA375	25	29
rfMRI	ICA376	26	29
rfMRI	ICA377	27	29
rfMRI	ICA378	28	29
rfMRI	ICA379	2	30
rfMRI	ICA380	3	30
rfMRI	ICA381	4	30
rfMRI	ICA382	5	30
rfMRI	ICA383	6	30
rfMRI	ICA384	7	30
rfMRI	ICA385	8	30
rfMRI	ICA386	9	30
rfMRI	ICA387	10	30
rfMRI	ICA388	11	30
rfMRI	ICA389	12	30
rfMRI	ICA390	13	30
rfMRI	ICA391	14	30
rfMRI	ICA392	15	30
rfMRI	ICA393	16	30
rfMRI	ICA394	17	30
rfMRI	ICA395	18	30
rfMRI	ICA396	19	30
rfMRI	ICA397	20	30
rfMRI	ICA398	21	30
rfMRI	ICA399	22	30
rfMRI	ICA400	23	30
rfMRI	ICA401	24	30
rfMRI	ICA402	25	30
rfMRI	ICA403	26	30
rfMRI	ICA404	27	30
rfMRI	ICA405	28	30
rfMRI	ICA406	29	30
rfMRI	ICA407	2	31
rfMRI	ICA408	3	31
rfMRI	ICA409	4	31
rfMRI	ICA410	5	31
rfMRI	ICA411	6	31
rfMRI	ICA412	7	31
rfMRI	ICA413	8	31
rfMRI	ICA414	9	31
rfMRI	ICA415	10	31
rfMRI	ICA416	11	31
rfMRI	ICA417	12	31
rfMRI	ICA418	13	31
rfMRI	ICA419	14	31
rfMRI	ICA420	15	31
rfMRI	ICA421	16	31
rfMRI	ICA422	17	31
rfMRI	ICA423	18	31
rfMRI	ICA424	19	31
rfMRI	ICA425	20	31
rfMRI	ICA426	21	31
rfMRI	ICA427	22	31
rfMRI	ICA428	23	31
rfMRI	ICA429	24	31
rfMRI	ICA430	25	31
rfMRI	ICA431	26	31
rfMRI	ICA432	27	31
rfMRI	ICA433	28	31
rfMRI	ICA434	29	31
rfMRI	ICA435	30	31
rfMRI	ICA436	2	32
rfMRI	ICA437	3	32
rfMRI	ICA438	4	32
rfMRI	ICA439	5	32
rfMRI	ICA440	6	32
rfMRI	ICA441	7	32
rfMRI	ICA442	8	32
rfMRI	ICA443	9	32
rfMRI	ICA444	10	32
rfMRI	ICA445	11	32
rfMRI	ICA446	12	32
rfMRI	ICA447	13	32
rfMRI	ICA448	14	32
rfMRI	ICA449	15	32
rfMRI	ICA450	16	32
rfMRI	ICA451	17	32
rfMRI	ICA452	18	32
rfMRI	ICA453	19	32
rfMRI	ICA454	20	32
rfMRI	ICA455	21	32
rfMRI	ICA456	22	32
rfMRI	ICA457	23	32
rfMRI	ICA458	24	32
rfMRI	ICA459	25	32
rfMRI	ICA460	26	32
rfMRI	ICA461	27	32
rfMRI	ICA462	28	32
rfMRI	ICA463	29	32
rfMRI	ICA464	30	32
rfMRI	ICA465	31	32
rfMRI	ICA466	2	33
rfMRI	ICA467	3	33
rfMRI	ICA468	4	33
rfMRI	ICA469	5	33
rfMRI	ICA470	6	33
rfMRI	ICA471	7	33
rfMRI	ICA472	8	33
rfMRI	ICA473	9	33
rfMRI	ICA474	10	33
rfMRI	ICA475	11	33
rfMRI	ICA476	12	33
rfMRI	ICA477	13	33
rfMRI	ICA478	14	33
rfMRI	ICA479	15	33
rfMRI	ICA480	16	33
rfMRI	ICA481	17	33
rfMRI	ICA482	18	33
rfMRI	ICA483	19	33
rfMRI	ICA484	20	33
rfMRI	ICA485	21	33
rfMRI	ICA486	22	33
rfMRI	ICA487	23	33
rfMRI	ICA488	24	33
rfMRI	ICA489	25	33
rfMRI	ICA490	26	33
rfMRI	ICA491	27	33
rfMRI	ICA492	28	33
rfMRI	ICA493	29	33
rfMRI	ICA494	30	33
rfMRI	ICA495	31	33
rfMRI	ICA496	32	33
rfMRI	ICA497	2	34
rfMRI	ICA498	3	34
rfMRI	ICA499	4	34
rfMRI	ICA500	5	34
rfMRI	ICA501	6	34
rfMRI	ICA502	7	34
rfMRI	ICA503	8	34
rfMRI	ICA504	9	34
rfMRI	ICA505	10	34
rfMRI	ICA506	11	34
rfMRI	ICA507	12	34
rfMRI	ICA508	13	34
rfMRI	ICA509	14	34
rfMRI	ICA510	15	34
rfMRI	ICA511	16	34
rfMRI	ICA512	17	34
rfMRI	ICA513	18	34
rfMRI	ICA514	19	34
rfMRI	ICA515	20	34
rfMRI	ICA516	21	34
rfMRI	ICA517	22	34
rfMRI	ICA518	23	34
rfMRI	ICA519	24	34
rfMRI	ICA520	25	34
rfMRI	ICA521	26	34
rfMRI	ICA522	27	34
rfMRI	ICA523	28	34
rfMRI	ICA524	29	34
rfMRI	ICA525	30	34
rfMRI	ICA526	31	34
rfMRI	ICA527	32	34
rfMRI	ICA528	33	34
rfMRI	ICA529	2	35
rfMRI	ICA530	3	35
rfMRI	ICA531	4	35
rfMRI	ICA532	5	35
rfMRI	ICA533	6	35
rfMRI	ICA534	7	35
rfMRI	ICA535	8	35
rfMRI	ICA536	9	35
rfMRI	ICA537	10	35
rfMRI	ICA538	11	35
rfMRI	ICA539	12	35
rfMRI	ICA540	13	35
rfMRI	ICA541	14	35
rfMRI	ICA542	15	35
rfMRI	ICA543	16	35
rfMRI	ICA544	17	35
rfMRI	ICA545	18	35
rfMRI	ICA546	19	35
rfMRI	ICA547	20	35
rfMRI	ICA548	21	35
rfMRI	ICA549	22	35
rfMRI	ICA550	23	35
rfMRI	ICA551	24	35
rfMRI	ICA552	25	35
rfMRI	ICA553	26	35
rfMRI	ICA554	27	35
rfMRI	ICA555	28	35
rfMRI	ICA556	29	35
rfMRI	ICA557	30	35
rfMRI	ICA558	31	35
rfMRI	ICA559	32	35
rfMRI	ICA560	33	35
rfMRI	ICA561	34	35
rfMRI	ICA562	2	36
rfMRI	ICA563	3	36
rfMRI	ICA564	4	36
rfMRI	ICA565	5	36
rfMRI	ICA566	6	36
rfMRI	ICA567	7	36
rfMRI	ICA568	8	36
rfMRI	ICA569	9	36
rfMRI	ICA570	10	36
rfMRI	ICA571	11	36
rfMRI	ICA572	12	36
rfMRI	ICA573	13	36
rfMRI	ICA574	14	36
rfMRI	ICA575	15	36
rfMRI	ICA576	16	36
rfMRI	ICA577	17	36
rfMRI	ICA578	18	36
rfMRI	ICA579	19	36
rfMRI	ICA580	20	36
rfMRI	ICA581	21	36
rfMRI	ICA582	22	36
rfMRI	ICA583	23	36
rfMRI	ICA584	24	36
rfMRI	ICA585	25	36
rfMRI	ICA586	26	36
rfMRI	ICA587	27	36
rfMRI	ICA588	28	36
rfMRI	ICA589	29	36
rfMRI	ICA590	30	36
rfMRI	ICA591	31	36
rfMRI	ICA592	32	36
rfMRI	ICA593	33	36
rfMRI	ICA594	34	36
rfMRI	ICA595	35	36
rfMRI	ICA596	2	37
rfMRI	ICA597	3	37
rfMRI	ICA598	4	37
rfMRI	ICA599	5	37
rfMRI	ICA600	6	37
rfMRI	ICA601	7	37
rfMRI	ICA602	8	37
rfMRI	ICA603	9	37
rfMRI	ICA604	10	37
rfMRI	ICA605	11	37
rfMRI	ICA606	12	37
rfMRI	ICA607	13	37
rfMRI	ICA608	14	37
rfMRI	ICA609	15	37
rfMRI	ICA610	16	37
rfMRI	ICA611	17	37
rfMRI	ICA612	18	37
rfMRI	ICA613	19	37
rfMRI	ICA614	20	37
rfMRI	ICA615	21	37
rfMRI	ICA616	22	37
rfMRI	ICA617	23	37
rfMRI	ICA618	24	37
rfMRI	ICA619	25	37
rfMRI	ICA620	26	37
rfMRI	ICA621	27	37
rfMRI	ICA622	28	37
rfMRI	ICA623	29	37
rfMRI	ICA624	30	37
rfMRI	ICA625	31	37
rfMRI	ICA626	32	37
rfMRI	ICA627	33	37
rfMRI	ICA628	34	37
rfMRI	ICA629	35	37
rfMRI	ICA630	36	37
rfMRI	ICA631	2	38
rfMRI	ICA632	3	38
rfMRI	ICA633	4	38
rfMRI	ICA634	5	38
rfMRI	ICA635	6	38
rfMRI	ICA636	7	38
rfMRI	ICA637	8	38
rfMRI	ICA638	9	38
rfMRI	ICA639	10	38
rfMRI	ICA640	11	38
rfMRI	ICA641	12	38
rfMRI	ICA642	13	38
rfMRI	ICA643	14	38
rfMRI	ICA644	15	38
rfMRI	ICA645	16	38
rfMRI	ICA646	17	38
rfMRI	ICA647	18	38
rfMRI	ICA648	19	38
rfMRI	ICA649	20	38
rfMRI	ICA650	21	38
rfMRI	ICA651	22	38
rfMRI	ICA652	23	38
rfMRI	ICA653	24	38
rfMRI	ICA654	25	38
rfMRI	ICA655	26	38
rfMRI	ICA656	27	38
rfMRI	ICA657	28	38
rfMRI	ICA658	29	38
rfMRI	ICA659	30	38
rfMRI	ICA660	31	38
rfMRI	ICA661	32	38
rfMRI	ICA662	33	38
rfMRI	ICA663	34	38
rfMRI	ICA664	35	38
rfMRI	ICA665	36	38
rfMRI	ICA666	37	38
rfMRI	ICA667	2	39
rfMRI	ICA668	3	39
rfMRI	ICA669	4	39
rfMRI	ICA670	5	39
rfMRI	ICA671	6	39
rfMRI	ICA672	7	39
rfMRI	ICA673	8	39
rfMRI	ICA674	9	39
rfMRI	ICA675	10	39
rfMRI	ICA676	11	39
rfMRI	ICA677	12	39
rfMRI	ICA678	13	39
rfMRI	ICA679	14	39
rfMRI	ICA680	15	39
rfMRI	ICA681	16	39
rfMRI	ICA682	17	39
rfMRI	ICA683	18	39
rfMRI	ICA684	19	39
rfMRI	ICA685	20	39
rfMRI	ICA686	21	39
rfMRI	ICA687	22	39
rfMRI	ICA688	23	39
rfMRI	ICA689	24	39
rfMRI	ICA690	25	39
rfMRI	ICA691	26	39
rfMRI	ICA692	27	39
rfMRI	ICA693	28	39
rfMRI	ICA694	29	39
rfMRI	ICA695	30	39
rfMRI	ICA696	31	39
rfMRI	ICA697	32	39
rfMRI	ICA698	33	39
rfMRI	ICA699	34	39
rfMRI	ICA700	35	39
rfMRI	ICA701	36	39
rfMRI	ICA702	37	39
rfMRI	ICA703	38	39
rfMRI	ICA704	2	40
rfMRI	ICA705	3	40
rfMRI	ICA706	4	40
rfMRI	ICA707	5	40
rfMRI	ICA708	6	40
rfMRI	ICA709	7	40
rfMRI	ICA710	8	40
rfMRI	ICA711	9	40
rfMRI	ICA712	10	40
rfMRI	ICA713	11	40
rfMRI	ICA714	12	40
rfMRI	ICA715	13	40
rfMRI	ICA716	14	40
rfMRI	ICA717	15	40
rfMRI	ICA718	16	40
rfMRI	ICA719	17	40
rfMRI	ICA720	18	40
rfMRI	ICA721	19	40
rfMRI	ICA722	20	40
rfMRI	ICA723	21	40
rfMRI	ICA724	22	40
rfMRI	ICA725	23	40
rfMRI	ICA726	24	40
rfMRI	ICA727	25	40
rfMRI	ICA728	26	40
rfMRI	ICA729	27	40
rfMRI	ICA730	28	40
rfMRI	ICA731	29	40
rfMRI	ICA732	30	40
rfMRI	ICA733	31	40
rfMRI	ICA734	32	40
rfMRI	ICA735	33	40
rfMRI	ICA736	34	40
rfMRI	ICA737	35	40
rfMRI	ICA738	36	40
rfMRI	ICA739	37	40
rfMRI	ICA740	38	40
rfMRI	ICA741	39	40
rfMRI	ICA742	2	41
rfMRI	ICA743	3	41
rfMRI	ICA744	4	41
rfMRI	ICA745	5	41
rfMRI	ICA746	6	41
rfMRI	ICA747	7	41
rfMRI	ICA748	8	41
rfMRI	ICA749	9	41
rfMRI	ICA750	10	41
rfMRI	ICA751	11	41
rfMRI	ICA752	12	41
rfMRI	ICA753	13	41
rfMRI	ICA754	14	41
rfMRI	ICA755	15	41
rfMRI	ICA756	16	41
rfMRI	ICA757	17	41
rfMRI	ICA758	18	41
rfMRI	ICA759	19	41
rfMRI	ICA760	20	41
rfMRI	ICA761	21	41
rfMRI	ICA762	22	41
rfMRI	ICA763	23	41
rfMRI	ICA764	24	41
rfMRI	ICA765	25	41
rfMRI	ICA766	26	41
rfMRI	ICA767	27	41
rfMRI	ICA768	28	41
rfMRI	ICA769	29	41
rfMRI	ICA770	30	41
rfMRI	ICA771	31	41
rfMRI	ICA772	32	41
rfMRI	ICA773	33	41
rfMRI	ICA774	34	41
rfMRI	ICA775	35	41
rfMRI	ICA776	36	41
rfMRI	ICA777	37	41
rfMRI	ICA778	38	41
rfMRI	ICA779	39	41
rfMRI	ICA780	40	41
rfMRI	ICA781	2	42
rfMRI	ICA782	3	42
rfMRI	ICA783	4	42
rfMRI	ICA784	5	42
rfMRI	ICA785	6	42
rfMRI	ICA786	7	42
rfMRI	ICA787	8	42
rfMRI	ICA788	9	42
rfMRI	ICA789	10	42
rfMRI	ICA790	11	42
rfMRI	ICA791	12	42
rfMRI	ICA792	13	42
rfMRI	ICA793	14	42
rfMRI	ICA794	15	42
rfMRI	ICA795	16	42
rfMRI	ICA796	17	42
rfMRI	ICA797	18	42
rfMRI	ICA798	19	42
rfMRI	ICA799	20	42
rfMRI	ICA800	21	42
rfMRI	ICA801	22	42
rfMRI	ICA802	23	42
rfMRI	ICA803	24	42
rfMRI	ICA804	25	42
rfMRI	ICA805	26	42
rfMRI	ICA806	27	42
rfMRI	ICA807	28	42
rfMRI	ICA808	29	42
rfMRI	ICA809	30	42
rfMRI	ICA810	31	42
rfMRI	ICA811	32	42
rfMRI	ICA812	33	42
rfMRI	ICA813	34	42
rfMRI	ICA814	35	42
rfMRI	ICA815	36	42
rfMRI	ICA816	37	42
rfMRI	ICA817	38	42
rfMRI	ICA818	39	42
rfMRI	ICA819	40	42
rfMRI	ICA820	41	42
rfMRI	ICA821	2	43
rfMRI	ICA822	3	43
rfMRI	ICA823	4	43
rfMRI	ICA824	5	43
rfMRI	ICA825	6	43
rfMRI	ICA826	7	43
rfMRI	ICA827	8	43
rfMRI	ICA828	9	43
rfMRI	ICA829	10	43
rfMRI	ICA830	11	43
rfMRI	ICA831	12	43
rfMRI	ICA832	13	43
rfMRI	ICA833	14	43
rfMRI	ICA834	15	43
rfMRI	ICA835	16	43
rfMRI	ICA836	17	43
rfMRI	ICA837	18	43
rfMRI	ICA838	19	43
rfMRI	ICA839	20	43
rfMRI	ICA840	21	43
rfMRI	ICA841	22	43
rfMRI	ICA842	23	43
rfMRI	ICA843	24	43
rfMRI	ICA844	25	43
rfMRI	ICA845	26	43
rfMRI	ICA846	27	43
rfMRI	ICA847	28	43
rfMRI	ICA848	29	43
rfMRI	ICA849	30	43
rfMRI	ICA850	31	43
rfMRI	ICA851	32	43
rfMRI	ICA852	33	43
rfMRI	ICA853	34	43
rfMRI	ICA854	35	43
rfMRI	ICA855	36	43
rfMRI	ICA856	37	43
rfMRI	ICA857	38	43
rfMRI	ICA858	39	43
rfMRI	ICA859	40	43
rfMRI	ICA860	41	43
rfMRI	ICA861	42	43
rfMRI	ICA862	2	45
rfMRI	ICA863	3	45
rfMRI	ICA864	4	45
rfMRI	ICA865	5	45
rfMRI	ICA866	6	45
rfMRI	ICA867	7	45
rfMRI	ICA868	8	45
rfMRI	ICA869	9	45
rfMRI	ICA870	10	45
rfMRI	ICA871	11	45
rfMRI	ICA872	12	45
rfMRI	ICA873	13	45
rfMRI	ICA874	14	45
rfMRI	ICA875	15	45
rfMRI	ICA876	16	45
rfMRI	ICA877	17	45
rfMRI	ICA878	18	45
rfMRI	ICA879	19	45
rfMRI	ICA880	20	45
rfMRI	ICA881	21	45
rfMRI	ICA882	22	45
rfMRI	ICA883	23	45
rfMRI	ICA884	24	45
rfMRI	ICA885	25	45
rfMRI	ICA886	26	45
rfMRI	ICA887	27	45
rfMRI	ICA888	28	45
rfMRI	ICA889	29	45
rfMRI	ICA890	30	45
rfMRI	ICA891	31	45
rfMRI	ICA892	32	45
rfMRI	ICA893	33	45
rfMRI	ICA894	34	45
rfMRI	ICA895	35	45
rfMRI	ICA896	36	45
rfMRI	ICA897	37	45
rfMRI	ICA898	38	45
rfMRI	ICA899	39	45
rfMRI	ICA900	40	45
rfMRI	ICA901	41	45
rfMRI	ICA902	42	45
rfMRI	ICA903	43	45
rfMRI	ICA904	2	46
rfMRI	ICA905	3	46
rfMRI	ICA906	4	46
rfMRI	ICA907	5	46
rfMRI	ICA908	6	46
rfMRI	ICA909	7	46
rfMRI	ICA910	8	46
rfMRI	ICA911	9	46
rfMRI	ICA912	10	46
rfMRI	ICA913	11	46
rfMRI	ICA914	12	46
rfMRI	ICA915	13	46
rfMRI	ICA916	14	46
rfMRI	ICA917	15	46
rfMRI	ICA918	16	46
rfMRI	ICA919	17	46
rfMRI	ICA920	18	46
rfMRI	ICA921	19	46
rfMRI	ICA922	20	46
rfMRI	ICA923	21	46
rfMRI	ICA924	22	46
rfMRI	ICA925	23	46
rfMRI	ICA926	24	46
rfMRI	ICA927	25	46
rfMRI	ICA928	26	46
rfMRI	ICA929	27	46
rfMRI	ICA930	28	46
rfMRI	ICA931	29	46
rfMRI	ICA932	30	46
rfMRI	ICA933	31	46
rfMRI	ICA934	32	46
rfMRI	ICA935	33	46
rfMRI	ICA936	34	46
rfMRI	ICA937	35	46
rfMRI	ICA938	36	46
rfMRI	ICA939	37	46
rfMRI	ICA940	38	46
rfMRI	ICA941	39	46
rfMRI	ICA942	40	46
rfMRI	ICA943	41	46
rfMRI	ICA944	42	46
rfMRI	ICA945	43	46
rfMRI	ICA946	45	46
rfMRI	ICA947	2	48
rfMRI	ICA948	3	48
rfMRI	ICA949	4	48
rfMRI	ICA950	5	48
rfMRI	ICA951	6	48
rfMRI	ICA952	7	48
rfMRI	ICA953	8	48
rfMRI	ICA954	9	48
rfMRI	ICA955	10	48
rfMRI	ICA956	11	48
rfMRI	ICA957	12	48
rfMRI	ICA958	13	48
rfMRI	ICA959	14	48
rfMRI	ICA960	15	48
rfMRI	ICA961	16	48
rfMRI	ICA962	17	48
rfMRI	ICA963	18	48
rfMRI	ICA964	19	48
rfMRI	ICA965	20	48
rfMRI	ICA966	21	48
rfMRI	ICA967	22	48
rfMRI	ICA968	23	48
rfMRI	ICA969	24	48
rfMRI	ICA970	25	48
rfMRI	ICA971	26	48
rfMRI	ICA972	27	48
rfMRI	ICA973	28	48
rfMRI	ICA974	29	48
rfMRI	ICA975	30	48
rfMRI	ICA976	31	48
rfMRI	ICA977	32	48
rfMRI	ICA978	33	48
rfMRI	ICA979	34	48
rfMRI	ICA980	35	48
rfMRI	ICA981	36	48
rfMRI	ICA982	37	48
rfMRI	ICA983	38	48
rfMRI	ICA984	39	48
rfMRI	ICA985	40	48
rfMRI	ICA986	41	48
rfMRI	ICA987	42	48
rfMRI	ICA988	43	48
rfMRI	ICA989	45	48
rfMRI	ICA990	46	48
rfMRI	ICA991	2	49
rfMRI	ICA992	3	49
rfMRI	ICA993	4	49
rfMRI	ICA994	5	49
rfMRI	ICA995	6	49
rfMRI	ICA996	7	49
rfMRI	ICA997	8	49
rfMRI	ICA998	9	49
rfMRI	ICA999	10	49
rfMRI	ICA1000	11	49
rfMRI	ICA1001	12	49
rfMRI	ICA1002	13	49
rfMRI	ICA1003	14	49
rfMRI	ICA1004	15	49
rfMRI	ICA1005	16	49
rfMRI	ICA1006	17	49
rfMRI	ICA1007	18	49
rfMRI	ICA1008	19	49
rfMRI	ICA1009	20	49
rfMRI	ICA1010	21	49
rfMRI	ICA1011	22	49
rfMRI	ICA1012	23	49
rfMRI	ICA1013	24	49
rfMRI	ICA1014	25	49
rfMRI	ICA1015	26	49
rfMRI	ICA1016	27	49
rfMRI	ICA1017	28	49
rfMRI	ICA1018	29	49
rfMRI	ICA1019	30	49
rfMRI	ICA1020	31	49
rfMRI	ICA1021	32	49
rfMRI	ICA1022	33	49
rfMRI	ICA1023	34	49
rfMRI	ICA1024	35	49
rfMRI	ICA1025	36	49
rfMRI	ICA1026	37	49
rfMRI	ICA1027	38	49
rfMRI	ICA1028	39	49
rfMRI	ICA1029	40	49
rfMRI	ICA1030	41	49
rfMRI	ICA1031	42	49
rfMRI	ICA1032	43	49
rfMRI	ICA1033	45	49
rfMRI	ICA1034	46	49
rfMRI	ICA1035	48	49
rfMRI	ICA1036	2	50
rfMRI	ICA1037	3	50
rfMRI	ICA1038	4	50
rfMRI	ICA1039	5	50
rfMRI	ICA1040	6	50
rfMRI	ICA1041	7	50
rfMRI	ICA1042	8	50
rfMRI	ICA1043	9	50
rfMRI	ICA1044	10	50
rfMRI	ICA1045	11	50
rfMRI	ICA1046	12	50
rfMRI	ICA1047	13	50
rfMRI	ICA1048	14	50
rfMRI	ICA1049	15	50
rfMRI	ICA1050	16	50
rfMRI	ICA1051	17	50
rfMRI	ICA1052	18	50
rfMRI	ICA1053	19	50
rfMRI	ICA1054	20	50
rfMRI	ICA1055	21	50
rfMRI	ICA1056	22	50
rfMRI	ICA1057	23	50
rfMRI	ICA1058	24	50
rfMRI	ICA1059	25	50
rfMRI	ICA1060	26	50
rfMRI	ICA1061	27	50
rfMRI	ICA1062	28	50
rfMRI	ICA1063	29	50
rfMRI	ICA1064	30	50
rfMRI	ICA1065	31	50
rfMRI	ICA1066	32	50
rfMRI	ICA1067	33	50
rfMRI	ICA1068	34	50
rfMRI	ICA1069	35	50
rfMRI	ICA1070	36	50
rfMRI	ICA1071	37	50
rfMRI	ICA1072	38	50
rfMRI	ICA1073	39	50
rfMRI	ICA1074	40	50
rfMRI	ICA1075	41	50
rfMRI	ICA1076	42	50
rfMRI	ICA1077	43	50
rfMRI	ICA1078	45	50
rfMRI	ICA1079	46	50
rfMRI	ICA1080	48	50
rfMRI	ICA1081	49	50
rfMRI	ICA1082	2	52
rfMRI	ICA1083	3	52
rfMRI	ICA1084	4	52
rfMRI	ICA1085	5	52
rfMRI	ICA1086	6	52
rfMRI	ICA1087	7	52
rfMRI	ICA1088	8	52
rfMRI	ICA1089	9	52
rfMRI	ICA1090	10	52
rfMRI	ICA1091	11	52
rfMRI	ICA1092	12	52
rfMRI	ICA1093	13	52
rfMRI	ICA1094	14	52
rfMRI	ICA1095	15	52
rfMRI	ICA1096	16	52
rfMRI	ICA1097	17	52
rfMRI	ICA1098	18	52
rfMRI	ICA1099	19	52
rfMRI	ICA1100	20	52
rfMRI	ICA1101	21	52
rfMRI	ICA1102	22	52
rfMRI	ICA1103	23	52
rfMRI	ICA1104	24	52
rfMRI	ICA1105	25	52
rfMRI	ICA1106	26	52
rfMRI	ICA1107	27	52
rfMRI	ICA1108	28	52
rfMRI	ICA1109	29	52
rfMRI	ICA1110	30	52
rfMRI	ICA1111	31	52
rfMRI	ICA1112	32	52
rfMRI	ICA1113	33	52
rfMRI	ICA1114	34	52
rfMRI	ICA1115	35	52
rfMRI	ICA1116	36	52
rfMRI	ICA1117	37	52
rfMRI	ICA1118	38	52
rfMRI	ICA1119	39	52
rfMRI	ICA1120	40	52
rfMRI	ICA1121	41	52
rfMRI	ICA1122	42	52
rfMRI	ICA1123	43	52
rfMRI	ICA1124	45	52
rfMRI	ICA1125	46	52
rfMRI	ICA1126	48	52
rfMRI	ICA1127	49	52
rfMRI	ICA1128	50	52
rfMRI	ICA1129	2	53
rfMRI	ICA1130	3	53
rfMRI	ICA1131	4	53
rfMRI	ICA1132	5	53
rfMRI	ICA1133	6	53
rfMRI	ICA1134	7	53
rfMRI	ICA1135	8	53
rfMRI	ICA1136	9	53
rfMRI	ICA1137	10	53
rfMRI	ICA1138	11	53
rfMRI	ICA1139	12	53
rfMRI	ICA1140	13	53
rfMRI	ICA1141	14	53
rfMRI	ICA1142	15	53
rfMRI	ICA1143	16	53
rfMRI	ICA1144	17	53
rfMRI	ICA1145	18	53
rfMRI	ICA1146	19	53
rfMRI	ICA1147	20	53
rfMRI	ICA1148	21	53
rfMRI	ICA1149	22	53
rfMRI	ICA1150	23	53
rfMRI	ICA1151	24	53
rfMRI	ICA1152	25	53
rfMRI	ICA1153	26	53
rfMRI	ICA1154	27	53
rfMRI	ICA1155	28	53
rfMRI	ICA1156	29	53
rfMRI	ICA1157	30	53
rfMRI	ICA1158	31	53
rfMRI	ICA1159	32	53
rfMRI	ICA1160	33	53
rfMRI	ICA1161	34	53
rfMRI	ICA1162	35	53
rfMRI	ICA1163	36	53
rfMRI	ICA1164	37	53
rfMRI	ICA1165	38	53
rfMRI	ICA1166	39	53
rfMRI	ICA1167	40	53
rfMRI	ICA1168	41	53
rfMRI	ICA1169	42	53
rfMRI	ICA1170	43	53
rfMRI	ICA1171	45	53
rfMRI	ICA1172	46	53
rfMRI	ICA1173	48	53
rfMRI	ICA1174	49	53
rfMRI	ICA1175	50	53
rfMRI	ICA1176	52	53
rfMRI	ICA1177	2	57
rfMRI	ICA1178	3	57
rfMRI	ICA1179	4	57
rfMRI	ICA1180	5	57
rfMRI	ICA1181	6	57
rfMRI	ICA1182	7	57
rfMRI	ICA1183	8	57
rfMRI	ICA1184	9	57
rfMRI	ICA1185	10	57
rfMRI	ICA1186	11	57
rfMRI	ICA1187	12	57
rfMRI	ICA1188	13	57
rfMRI	ICA1189	14	57
rfMRI	ICA1190	15	57
rfMRI	ICA1191	16	57
rfMRI	ICA1192	17	57
rfMRI	ICA1193	18	57
rfMRI	ICA1194	19	57
rfMRI	ICA1195	20	57
rfMRI	ICA1196	21	57
rfMRI	ICA1197	22	57
rfMRI	ICA1198	23	57
rfMRI	ICA1199	24	57
rfMRI	ICA1200	25	57
rfMRI	ICA1201	26	57
rfMRI	ICA1202	27	57
rfMRI	ICA1203	28	57
rfMRI	ICA1204	29	57
rfMRI	ICA1205	30	57
rfMRI	ICA1206	31	57
rfMRI	ICA1207	32	57
rfMRI	ICA1208	33	57
rfMRI	ICA1209	34	57
rfMRI	ICA1210	35	57
rfMRI	ICA1211	36	57
rfMRI	ICA1212	37	57
rfMRI	ICA1213	38	57
rfMRI	ICA1214	39	57
rfMRI	ICA1215	40	57
rfMRI	ICA1216	41	57
rfMRI	ICA1217	42	57
rfMRI	ICA1218	43	57
rfMRI	ICA1219	45	57
rfMRI	ICA1220	46	57
rfMRI	ICA1221	48	57
rfMRI	ICA1222	49	57
rfMRI	ICA1223	50	57
rfMRI	ICA1224	52	57
rfMRI	ICA1225	53	57
rfMRI	ICA1226	2	58
rfMRI	ICA1227	3	58
rfMRI	ICA1228	4	58
rfMRI	ICA1229	5	58
rfMRI	ICA1230	6	58
rfMRI	ICA1231	7	58
rfMRI	ICA1232	8	58
rfMRI	ICA1233	9	58
rfMRI	ICA1234	10	58
rfMRI	ICA1235	11	58
rfMRI	ICA1236	12	58
rfMRI	ICA1237	13	58
rfMRI	ICA1238	14	58
rfMRI	ICA1239	15	58
rfMRI	ICA1240	16	58
rfMRI	ICA1241	17	58
rfMRI	ICA1242	18	58
rfMRI	ICA1243	19	58
rfMRI	ICA1244	20	58
rfMRI	ICA1245	21	58
rfMRI	ICA1246	22	58
rfMRI	ICA1247	23	58
rfMRI	ICA1248	24	58
rfMRI	ICA1249	25	58
rfMRI	ICA1250	26	58
rfMRI	ICA1251	27	58
rfMRI	ICA1252	28	58
rfMRI	ICA1253	29	58
rfMRI	ICA1254	30	58
rfMRI	ICA1255	31	58
rfMRI	ICA1256	32	58
rfMRI	ICA1257	33	58
rfMRI	ICA1258	34	58
rfMRI	ICA1259	35	58
rfMRI	ICA1260	36	58
rfMRI	ICA1261	37	58
rfMRI	ICA1262	38	58
rfMRI	ICA1263	39	58
rfMRI	ICA1264	40	58
rfMRI	ICA1265	41	58
rfMRI	ICA1266	42	58
rfMRI	ICA1267	43	58
rfMRI	ICA1268	45	58
rfMRI	ICA1269	46	58
rfMRI	ICA1270	48	58
rfMRI	ICA1271	49	58
rfMRI	ICA1272	50	58
rfMRI	ICA1273	52	58
rfMRI	ICA1274	53	58
rfMRI	ICA1275	57	58
rfMRI	ICA1276	2	60
rfMRI	ICA1277	3	60
rfMRI	ICA1278	4	60
rfMRI	ICA1279	5	60
rfMRI	ICA1280	6	60
rfMRI	ICA1281	7	60
rfMRI	ICA1282	8	60
rfMRI	ICA1283	9	60
rfMRI	ICA1284	10	60
rfMRI	ICA1285	11	60
rfMRI	ICA1286	12	60
rfMRI	ICA1287	13	60
rfMRI	ICA1288	14	60
rfMRI	ICA1289	15	60
rfMRI	ICA1290	16	60
rfMRI	ICA1291	17	60
rfMRI	ICA1292	18	60
rfMRI	ICA1293	19	60
rfMRI	ICA1294	20	60
rfMRI	ICA1295	21	60
rfMRI	ICA1296	22	60
rfMRI	ICA1297	23	60
rfMRI	ICA1298	24	60
rfMRI	ICA1299	25	60
rfMRI	ICA1300	26	60
rfMRI	ICA1301	27	60
rfMRI	ICA1302	28	60
rfMRI	ICA1303	29	60
rfMRI	ICA1304	30	60
rfMRI	ICA1305	31	60
rfMRI	ICA1306	32	60
rfMRI	ICA1307	33	60
rfMRI	ICA1308	34	60
rfMRI	ICA1309	35	60
rfMRI	ICA1310	36	60
rfMRI	ICA1311	37	60
rfMRI	ICA1312	38	60
rfMRI	ICA1313	39	60
rfMRI	ICA1314	40	60
rfMRI	ICA1315	41	60
rfMRI	ICA1316	42	60
rfMRI	ICA1317	43	60
rfMRI	ICA1318	45	60
rfMRI	ICA1319	46	60
rfMRI	ICA1320	48	60
rfMRI	ICA1321	49	60
rfMRI	ICA1322	50	60
rfMRI	ICA1323	52	60
rfMRI	ICA1324	53	60
rfMRI	ICA1325	57	60
rfMRI	ICA1326	58	60
rfMRI	ICA1327	2	63
rfMRI	ICA1328	3	63
rfMRI	ICA1329	4	63
rfMRI	ICA1330	5	63
rfMRI	ICA1331	6	63
rfMRI	ICA1332	7	63
rfMRI	ICA1333	8	63
rfMRI	ICA1334	9	63
rfMRI	ICA1335	10	63
rfMRI	ICA1336	11	63
rfMRI	ICA1337	12	63
rfMRI	ICA1338	13	63
rfMRI	ICA1339	14	63
rfMRI	ICA1340	15	63
rfMRI	ICA1341	16	63
rfMRI	ICA1342	17	63
rfMRI	ICA1343	18	63
rfMRI	ICA1344	19	63
rfMRI	ICA1345	20	63
rfMRI	ICA1346	21	63
rfMRI	ICA1347	22	63
rfMRI	ICA1348	23	63
rfMRI	ICA1349	24	63
rfMRI	ICA1350	25	63
rfMRI	ICA1351	26	63
rfMRI	ICA1352	27	63
rfMRI	ICA1353	28	63
rfMRI	ICA1354	29	63
rfMRI	ICA1355	30	63
rfMRI	ICA1356	31	63
rfMRI	ICA1357	32	63
rfMRI	ICA1358	33	63
rfMRI	ICA1359	34	63
rfMRI	ICA1360	35	63
rfMRI	ICA1361	36	63
rfMRI	ICA1362	37	63
rfMRI	ICA1363	38	63
rfMRI	ICA1364	39	63
rfMRI	ICA1365	40	63
rfMRI	ICA1366	41	63
rfMRI	ICA1367	42	63
rfMRI	ICA1368	43	63
rfMRI	ICA1369	45	63
rfMRI	ICA1370	46	63
rfMRI	ICA1371	48	63
rfMRI	ICA1372	49	63
rfMRI	ICA1373	50	63
rfMRI	ICA1374	52	63
rfMRI	ICA1375	53	63
rfMRI	ICA1376	57	63
rfMRI	ICA1377	58	63
rfMRI	ICA1378	60	63
rfMRI	ICA1379	2	64
rfMRI	ICA1380	3	64
rfMRI	ICA1381	4	64
rfMRI	ICA1382	5	64
rfMRI	ICA1383	6	64
rfMRI	ICA1384	7	64
rfMRI	ICA1385	8	64
rfMRI	ICA1386	9	64
rfMRI	ICA1387	10	64
rfMRI	ICA1388	11	64
rfMRI	ICA1389	12	64
rfMRI	ICA1390	13	64
rfMRI	ICA1391	14	64
rfMRI	ICA1392	15	64
rfMRI	ICA1393	16	64
rfMRI	ICA1394	17	64
rfMRI	ICA1395	18	64
rfMRI	ICA1396	19	64
rfMRI	ICA1397	20	64
rfMRI	ICA1398	21	64
rfMRI	ICA1399	22	64
rfMRI	ICA1400	23	64
rfMRI	ICA1401	24	64
rfMRI	ICA1402	25	64
rfMRI	ICA1403	26	64
rfMRI	ICA1404	27	64
rfMRI	ICA1405	28	64
rfMRI	ICA1406	29	64
rfMRI	ICA1407	30	64
rfMRI	ICA1408	31	64
rfMRI	ICA1409	32	64
rfMRI	ICA1410	33	64
rfMRI	ICA1411	34	64
rfMRI	ICA1412	35	64
rfMRI	ICA1413	36	64
rfMRI	ICA1414	37	64
rfMRI	ICA1415	38	64
rfMRI	ICA1416	39	64
rfMRI	ICA1417	40	64
rfMRI	ICA1418	41	64
rfMRI	ICA1419	42	64
rfMRI	ICA1420	43	64
rfMRI	ICA1421	45	64
rfMRI	ICA1422	46	64
rfMRI	ICA1423	48	64
rfMRI	ICA1424	49	64
rfMRI	ICA1425	50	64
rfMRI	ICA1426	52	64
rfMRI	ICA1427	53	64
rfMRI	ICA1428	57	64
rfMRI	ICA1429	58	64
rfMRI	ICA1430	60	64
rfMRI	ICA1431	63	64
rfMRI	ICA1432	2	93
rfMRI	ICA1433	3	93
rfMRI	ICA1434	4	93
rfMRI	ICA1435	5	93
rfMRI	ICA1436	6	93
rfMRI	ICA1437	7	93
rfMRI	ICA1438	8	93
rfMRI	ICA1439	9	93
rfMRI	ICA1440	10	93
rfMRI	ICA1441	11	93
rfMRI	ICA1442	12	93
rfMRI	ICA1443	13	93
rfMRI	ICA1444	14	93
rfMRI	ICA1445	15	93
rfMRI	ICA1446	16	93
rfMRI	ICA1447	17	93
rfMRI	ICA1448	18	93
rfMRI	ICA1449	19	93
rfMRI	ICA1450	20	93
rfMRI	ICA1451	21	93
rfMRI	ICA1452	22	93
rfMRI	ICA1453	23	93
rfMRI	ICA1454	24	93
rfMRI	ICA1455	25	93
rfMRI	ICA1456	26	93
rfMRI	ICA1457	27	93
rfMRI	ICA1458	28	93
rfMRI	ICA1459	29	93
rfMRI	ICA1460	30	93
rfMRI	ICA1461	31	93
rfMRI	ICA1462	32	93
rfMRI	ICA1463	33	93
rfMRI	ICA1464	34	93
rfMRI	ICA1465	35	93
rfMRI	ICA1466	36	93
rfMRI	ICA1467	37	93
rfMRI	ICA1468	38	93
rfMRI	ICA1469	39	93
rfMRI	ICA1470	40	93
rfMRI	ICA1471	41	93
rfMRI	ICA1472	42	93
rfMRI	ICA1473	43	93
rfMRI	ICA1474	45	93
rfMRI	ICA1475	46	93
rfMRI	ICA1476	48	93
rfMRI	ICA1477	49	93
rfMRI	ICA1478	50	93
rfMRI	ICA1479	52	93
rfMRI	ICA1480	53	93
rfMRI	ICA1481	57	93
rfMRI	ICA1482	58	93
rfMRI	ICA1483	60	93
rfMRI	ICA1484	63	93
rfMRI	ICA1485	64	93

## Sheet: Supplementary Table 4
Supplementary Table 4: Details of 39 Mental health questionnaires in UK biobank
Field	Description	Question	Answers
1920	Mood swings	Does your mood often go up and down?	1. Yes 0. No -1. Do not know -3.Prefer not to answer
1930	Miserableness	Do you ever feel 'just miserable' for no reason?	1. Yes 0. No -1. Do not know -3.Prefer not to answer
1940	Irritability	Are you an irritable person?	1. Yes 0. No -1. Do not know -3.Prefer not to answer
1950	Sensitivity/hurt feelings	Are your feelings easily hurt?	1. Yes 0. No -1. Do not know -3.Prefer not to answer
1960	Fed-up feelings	Do you often feel 'fed-up'?	1. Yes 0. No -1. Do not know -3.Prefer not to answer
1970	Nervous feelings	Would you call yourself a nervous person?	1. Yes 0. No -1. Do not know -3.Prefer not to answer
1980	Worrier/anxious feelings	Are you a worrier?	1. Yes 0. No -1. Do not know -3.Prefer not to answer
1990	Tense/'highly strung'	Would you call yourself tense or 'highly strung'?	1. Yes 0. No -1. Do not know -3.Prefer not to answer
2000	Worry too long after embarrassment	Do you worry too long after an embarrassing experience?	1. Yes 0. No -1. Do not know -3.Prefer not to answer
2010	Suffer from 'nerves'	Do you suffer from 'nerves'?	1. Yes 0. No -1. Do not know -3.Prefer not to answer
2020	Loneliness, isolation	Do you often feel lonely?	1. Yes 0. No -1. Do not know -3.Prefer not to answer
2030	Guilty feelings	Are you often troubled by feelings of guilt?	1. Yes 0. No -1. Do not know -3.Prefer not to answer
2040	Risk taking	Would you describe yourself as someone who takes risks?	1. Yes 0. No -1. Do not know -3.Prefer not to answer
2050	Frequency of depressed mood in last 2 weeks	Over the past two weeks, how often have you felt down, depressed or hopeless?	0. Not at all 1. Several days 2. More than half the days 3. Nearly every day -1. Do not know -3. Prefer not to answer
2060	Frequency of unenthusiasm/disinterest in last 2 weeks	Over the past two weeks, how often have you had little interest or pleasure in doing things?	0. Not at all 1. Several days 2. More than half the days 3. Nearly every day -1. Do not know -3. Prefer not to answer
2070	Frequency of tenseness/restlessness in last 2 weeks	Over the past two weeks, how often have you felt tense, fidgety or restless?	0. Not at all 1. Several days 2. More than half the days 3. Nearly every day -1. Do not know -3. Prefer not to answer
2080	Frequency of tiredness/lethargy in last 2 weeks	Over the past two weeks, how often have you felt tired or had little energy?	0. Not at all 1. Several days 2. More than half the days 3. Nearly every day -1. Do not know -3. Prefer not to answer
4598	Ever depressed for a whole week	Looking back over your life, have you ever had a time when you were feeling depressed or down for at least a whole week?	1 : Yes 0 : No -1 : Do not know -3 : Prefer not to answer
4609	Longest period of depression	How many weeks was the longest period when you were feeling depressed or down?	Enter INTEGER OR -1 : Do not know OR -3 : Prefer not to answer
4620	Number of depression episodes	How many periods have you had when you were feeling depressed or down for at least a whole week?	Enter INTEGER OR -1 : Do not know OR -3 : Prefer not to answer
4631	Ever unenthusiastic/disinterested for a whole week	Have you ever had a time when you were uninterested in things or unable to enjoy the things you used to for at least a whole week?	1 : Yes 0 : No -1 : Do not know -3 : Prefer not to answer
4642	Ever manic/hyper for 2 days	Have you ever had a period of time lasting at least two days when you were feeling so good, "high", excited or "hyper" that other people thought you were not your normal self or you were so "hyper" that you got into trouble?	1 : Yes 0 : No -1 : Do not know -3 : Prefer not to answer
4653	Ever highly irritable/argumentative for 2 days	Have you ever had a period of time lasting at least two days when you were so irritable that you found yourself shouting at people or starting fights or arguments?	1 : Yes 0 : No -1 : Do not know -3 : Prefer not to answer
5375	Longest period of unenthusiasm/disinterest	How many weeks was the longest period when you were feeling depressed or down?	Enter INTEGER OR -1 : Do not know OR -3 : Prefer not to answer
5386	Number of unenthusiastic/disinterested episodes	How many periods have you had when you were uninterested in things or unable to enjoy the things you used to for at least a whole week?	Enter INTEGER OR -1 : Do not know OR -3 : Prefer not to answer
5663	Length of longest manic/irritable episode	What is the longest time period that these "high" or "irritable" periods have lasted?	1: At least two days, but less than a week 2: Less than a week 3: A week or more -1 : Do not know -3 : Prefer not to answer
5674	Severity of manic/irritable episodes	How much of a problem have these "high" or "irritable" periods caused you?	0: No problems 1: Needed treatment or caused problems with work,relationships, finances, thelaw or other aspects of life -1 : Do not know -3 : Prefer not to answer
6145	Illness, injury, bereavement, stress in last 2 years	In the last 2 years have you experienced any of the following? (You can select more than one answer)	1. Serious illness, injury or assault to yourself 0. No -7. None of the above -3. Prefer not to answer
6156	More active	Please try to remember a period when you were in a "high" or "irritable" state and select which of the following apply: 11: I was more active than usual	1 : Yes 0 : No
	More talkative	Please try to remember a period when you were in a "high" or "irritable" state and select which of the following apply: 12: I was more talkative than usual	1 : Yes 0 : No
	Less sleep	Please try to remember a period when you were in a "high" or "irritable" state and select which of the following apply: 13: I needed less sleep than usual	1 : Yes 0 : No
	More creative or had more ideas	Please try to remember a period when you were in a "high" or "irritable" state and select which of the following apply: 14: I was more creative or had more ideas than usual	1 : Yes 0 : No
	More active/talkative/creative/ideas/less sleep	Please try to remember a period when you were in a "high" or "irritable" state and select which of the following apply: 15: All of the above	1 : Yes 0 : No
20122	Bipolar Type I (Mania)	Bipolar disorder status of participant defined from the touchscreen at baseline	1 : Yes 0 : No
	Bipolar Type II (Hypomania)	Bipolar disorder status of participant defined from the touchscreen at baseline	1 : Yes 0 : No
20123	Single episode of probable major depression	Lifetime major depression (MD) status of participant defined from the touchscreen questionnaire at baseline	1 = history of major depression
20124	Probable recurrent major depression (moderate)	Lifetime major depression (MD) status of participant defined from the touchscreen questionnaire at baseline	1 = history of major depression
20125	Probable recurrent major depression (severe)	Lifetime major depression (MD) status of participant defined from the touchscreen questionnaire at baseline	1 = history of major depression
20127	Neuroticism score	The score was generated by summarizing the number of Yes answers across these twelve neurotic behaviour domains into a single integer score for each participant (0 to 12): 1. Does your mood often go up and down? 2. Do you ever feel 'just miserable' for no reason? 3. Are you an irritable person? 4. Are your feelings easily hurt? 5. Do you often feel 'fed-up'? 6. Would you call yourself a nervous p…	For each question, participants could answer: 1. Yes 0. No -1. Do not know -3.Prefer not to answer

## Sheet: Supplementary Table 5
Supplementary Table 6: Summary the goodness of fit of CFA in predict dataset of ten-fold cross-validation.
	1-fold	2-fold	3-fold	4-fold	5-fold	6-fold	7-fold	8-fold	9-fold	10-fold	mean	standard deviation
Comparative Fit Index (CFI)	0.985287	0.988693	0.987029	0.987	0.98757	0.987867	0.98912	0.989471	0.985009	0.983981	0.987103	0.00183933
Tucker-Lewis Index (TLI)	0.963217	0.971733	0.967573	0.9675	0.968925	0.969667	0.9728	0.973677	0.962523	0.959954	0.967757	0.00459834
Root Mean Square Error of Approximation (RMSEA)	0.0590625	0.0621184	0.0605206	0.050637	0.0512528	0.0544387	0.0556245	0.0561093	0.0556198	0.0514689	0.0556853	0.00395563
Standardized Root Mean Square Residual (SRMR)	0.0230102	0.020107	0.0217712	0.0218886	0.0214361	0.0210658	0.0202194	0.0200817	0.0236405	0.0242714	0.0217492	0.00148814

## Sheet: Supplementary Table 6
Supplementary Table 6: Summary of EFA loading in predict dataset of ten-fold cross-validation.
	1-fold	2-fold	3-fold	4-fold	5-fold	6-fold	7-fold	8-fold	9-fold	10-fold	mean	standard deviation
ISWB loading
Happiness	0.501	0.506	0.503	0.499	0.503	0.506	0.501	0.505	0.505	0.504	0.5033	0.00235938
Health Satisfaction	0.556	0.506	0.555	0.559	0.558	0.557	0.556	0.557	0.556	0.559	0.5519	0.0161826
Financial Situation Satisfaction	0.462	0.465	0.462	0.463	0.467	0.467	0.462	0.466	0.467	0.466	0.4647	0.00221359
SSWB loading
Friendship Satisfaction	0.693	0.694	0.695	0.695	0.693	0.697	0.697	0.692	0.695	0.692	0.6943	0.00182878
Family Relationship Satisfaction	0.646	0.64	0.644	0.644	0.642	0.64	0.643	0.643	0.639	0.644	0.6425	0.00222361

## Sheet: Supplementary Table 7
Supplementary Table 7: Association between ISWB and urbanization using linear regression.
Group	Name	t_value	p_value	Bonferroni
IMD	Index of Multiple Deprivation (England,Scotland,Wales)	58.5426	2.22507e-308	1.1468e-304
Air pollution	Nitrogen dioxide air pollution 2010	28.8095	3.89051e-182	2.00517e-178
Air pollution	Particulate matter air pollution pm2.5 2010	27.943	1.75572e-171	9.04897e-168
Air pollution	Nitrogen oxides air pollution 2010	26.8132	4.35673e-158	2.24546e-154
Greenspace proximity	Natural environment percentage buffer 300m	-24.0406	1.60119e-127	8.25251e-124
Greenspace proximity	Greenspace percentage buffer 300m	-21.8717	6.52434e-106	3.36264e-102
Destination Accessibility	ND Preparatory/First/Primary/Infant/Junior/M iddle School	-20.5051	2.43599e-93	1.25551e-89
Air pollution	Particulate matter air pollution pm2.5 absorbance 2010	20.473	4.70323e-93	2.42405e-89
Destination Accessibility	ND Factory/Manufacturing	-20.3525	5.51418e-92	2.84201e-88
Destination Accessibility	ND GP Practice Surgery/Clinic	-20.1539	3.08242e-90	1.58868e-86
Destination Accessibility	ND College	-19.5187	9.19819e-85	4.74075e-81
Destination Accessibility	ND Government Service	-19.4677	2.48374e-84	1.28012e-80
Destination Accessibility	ND Fast Food Outlet/Takeaway(Hot/Cold)	-19.3378	3.09564e-83	1.59549e-79
Air pollution	Particulate matter air pollution pm10 2010	19.1284	1.74262e-81	8.98148e-78
Destination Accessibility	ND Retail Service Agent	-18.4467	6.44397e-76	3.32122e-72
Destination Accessibility	ND Police/Transport Police Station	-17.9077	1.17269e-71	6.04406e-68
Destination Accessibility	ND Bank/Financial Service	-17.6286	1.68545e-69	8.68679e-66
Destination Accessibility	ND Workshop/Light Industrial	-17.5713	4.6235e-69	2.38295e-65
Destination Accessibility	ND Restaurant/Cafeteria	-17.294	5.86137e-67	3.02095e-63
Street network Accessibility	Links	16.9587	1.88717e-64	9.72649e-61
Destination Accessibility	ND Warehouse/Store/Storage Depot	-16.8821	6.77361e-64	3.49112e-60
Destination Accessibility	ND Public/Village Hall/Other Community Facility	-16.2277	3.51866e-59	1.81352e-55
Street network Accessibility	Length	16.0941	3.11422e-58	1.60507e-54
Destination Accessibility	Local Government Service	-16.0085	1.21318e-57	6.25273e-54
Destination Accessibility	ND Childrens Nursery/Creche	-15.9261	4.54081e-57	2.34033e-53
Destination Accessibility	ND Ambulance Station	-15.8056	3.08611e-56	1.59058e-52
Destination Accessibility	ND Job Centre	-15.6772	2.34231e-55	1.20722e-51
Destination Accessibility	ND Post Office	-15.5895	9.27247e-55	4.77903e-51
Destination Accessibility	ND Library	-15.5027	3.58348e-54	1.84693e-50
Destination Accessibility	ND Dentist	-15.384	2.2549e-53	1.16217e-49
Destination Accessibility	ND Bingo Hall/Cinema/Conference/Exhibition Centre/Theatre/Concert Hall	-15.132	1.06586e-51	5.49344e-48
Destination Accessibility	ND Hospital/Hospice	-14.6457	1.52326e-48	7.85087e-45
Destination Accessibility	ND Fire Station	-13.8078	2.3995e-43	1.2367e-39
LandUse Density	Den Fast Food Outlet/Takeaway(Hot/Cold)	13.3564	1.1326e-40	5.83741e-37
Destination Accessibility	ND Secondary/High School	-13.2308	6.06573e-40	3.12628e-36
Destination Accessibility	ND Places of Worship	-12.7638	2.70509e-37	1.39421e-33
Street network Accessibility	Network Quantity Penalized for Distance	12.623	1.64197e-36	8.46273e-33
LandUse Density	Den Workshop/Light Industrial	12.5473	4.24642e-36	2.1886e-32
Destination Accessibility	ND Public House/Bar/Night Club	-12.3811	3.41093e-35	1.75799e-31
Street network Accessibility	Mean Geometric Length	12.0319	2.49756e-33	1.28724e-29
LandUse Density	Den Shop/Showroom	11.856	2.05455e-32	1.05891e-28
LandUse Density	Den Other Licensed Premise/Vendor	11.2827	1.63229e-29	8.41283e-26
LandUse Density	Den Warehouse/Store/Storage Depot	10.895	1.24006e-27	6.39128e-24
Destination Accessibility	ND Recycling	-10.7306	7.43864e-27	3.83387e-23
Street network Accessibility	Two Phase Destination assignment	-10.4278	1.88541e-25	9.71741e-22
Street network Accessibility	Link Length	-10.1094	5.10216e-24	2.62965e-20
LandUse Density	Den Licensed Private Members’ Club	10.0195	1.26754e-23	6.5329e-20
LandUse Density	Den Community Services	9.57945	9.8656e-22	5.08473e-18
Destination Accessibility	ND Power Station/Energy Production	-9.51048	1.91847e-21	9.88777e-18
Street network Accessibility	Betweenness	8.45036	2.92773e-17	1.50895e-13
Street network Accessibility	Convex Hull Area	8.0516	8.22723e-16	4.24031e-12
LandUse Density	Den Amenity-Open areas not attracting visitors	7.94321	1.98059e-15	1.0208e-11
Street network Accessibility	Angular Distance	7.8951	2.91892e-15	1.50441e-11
Destination Accessibility	ND Mineral/Ore Working/Quarry/Mine	-7.61155	2.72038e-14	1.40208e-10
LandUse Density	Den Factory/Manufacturing	7.57959	3.4819e-14	1.79457e-10
Air pollution	Particulate matter air pollution pm2.5 10um 2010	7.44357	9.84021e-14	5.07164e-10
Destination Accessibility	ND Landfill	-7.10144	1.23888e-12	6.38518e-09
LandUse Density	Den Retail Service Agent	6.89937	5.23933e-12	2.70035e-08
LandUse Density	Den Storage Land	6.73652	1.62676e-11	8.38432e-08
Street network Accessibility	Mean Angular Distance	6.71107	1.9384e-11	9.99053e-08
LandUse Density	Den Library	6.64813	2.97624e-11	1.53395e-07
LandUse Density	Den Information	6.6136	3.76062e-11	1.93822e-07
LandUse Density	Den Public House/Bar/Nightclub	6.58675	4.507e-11	2.32291e-07
Sound pollution	Average daytime sound level of noise pollution	6.55343	5.63659e-11	2.9051e-07
LandUse Density	Den Bank/Financial Service	6.32864	2.47869e-10	1.27752e-06
LandUse Density	Den Medical	6.23731	4.46075e-10	2.29907e-06
LandUse Density	Den Farm Non Residential Associated Building	-6.03984	1.54547e-09	7.96537e-06
Destination Accessibility	ND Car/Coach/Commercial Vehicle/Taxi/Parking/Park and Ride Site	-5.95872	2.54664e-09	1.31254e-05
Traffic	Sum of road length of major roads within 100m	5.95518	2.60216e-09	1.34115e-05
Street network Accessibility	Link Ang Curvature	-5.93355	2.97057e-09	1.53103e-05
LandUse Density	Den Education	5.69765	1.21647e-08	6.2697e-05
Traffic	Total traffic load on major roads	5.57469	2.48299e-08	0.000127973
LandUse Density	Den Restaurant/Cafeteria	5.47826	4.30056e-08	0.000221651
Traffic	Inverse distance to the nearest major road	5.34271	9.16664e-08	0.000472449
LandUse Density	Den Petrol Filling Station	5.27137	1.35553e-07	0.000698641
Destination Accessibility	ND University	-4.84401	1.27343e-06	0.00656326
LandUse Density	Den Automated Teller Machine(ATM)	4.5048	6.64742e-06	0.0342608
Street network Accessibility	Diversion Ratio	4.49901	6.83169e-06	0.0352105
Traffic	Inverse distance to the nearest road	4.40538	1.05656e-05	0.0544549
Traffic	Close to major road	4.23554	2.28107e-05	0.117566
Destination Accessibility	ND Water/Waste Water/Sewage Treatment Works	4.11457	3.88062e-05	0.200007
LandUse Density	Den Park	4.10766	3.99852e-05	0.206084
LandUse Density	Den Wholesale Distribution	4.04189	5.30418e-05	0.273378
Traffic	Traffic intensity on the nearest major road	4.02893	5.60518e-05	0.288891
Coast proximity	Distance Euclidean to coast	3.95218	7.74697e-05	0.399279
Street network Accessibility	Convex Hull Perimeter	3.95214	7.74899e-05	0.399383
LandUse Density	Den Office/Work Studio	3.74411	0.000181084	0.933307
Water proximity	Water percentage buffer 300m	-3.7227	0.000197158	1.01615
LandUse Density	Den Holiday/Campsite	3.63436	0.000278747	1.43666
Terrain	Terrain	-3.60901	0.000307444	1.58457
LandUse Density	Den Recycling Plant	3.07048	0.00213743	11.0163
LandUse Density	Den Unused Land	2.95685	0.0031084	16.0207
LandUse Density	Den Object of Interest	-2.93783	0.00330553	17.0367
LandUse Density	Den Transport	2.93287	0.0033588	17.3112
Street network Accessibility	Convex Hull Max Radius	-2.89162	0.00383311	19.7559
LandUse Density	Den Utility	2.86032	0.00423263	21.815
LandUse Density	Den Maintenance Depot	2.55988	0.0104716	53.9704
LandUse Density	Den Incinerator/Waste Transfer Station	2.47318	0.0133927	69.0259
LandUse Density	Den Emergency/Rescue Service	2.44764	0.0143805	74.1172
Traffic	Traffic intensity on the nearest road	2.41985	0.0155278	80.0301
LandUse Density	Den Residential	2.41348	0.0158017	81.4422
Street network Accessibility	Convex Hull Shape Index	-2.40159	0.0163252	84.1402
LandUse Density	Den Military	2.19203	0.0283783	146.262
LandUse Density	Den Indoor Outdoor Leisure Sporting Activity Centre	2.15297	0.0313223	161.435
Greenspace proximity	Domestic garden percentage buffer 300m	2.13158	0.0330424	170.301
LandUse Density	Den Animal Centre	2.03409	0.0419443	216.181
LandUse Density	Den Mineral/Ore Working/Quarry/Mine	1.90384	0.0569322	293.429
NDVI	Normalized Difference Vegetation Index	-1.86641	0.0619864	319.478
Street network Accessibility	Mean Crow Flight Distance	-1.79752	0.0722544	372.399
LandUse Density	Den Open Space	1.7265	0.084259	434.271
Building Class	Building Class	1.5762	0.114983	592.62
Street network Accessibility	Link Connectivity	1.36326	0.172804	890.631
Street network Accessibility	Convex Hull Bearing	-1.14899	0.250563	1291.4
Street network Accessibility	Two Phase Betweenness	-1.12919	0.25882	1333.96
LandUse Density	Den Museum Gallery	-1.00662	0.314117	1618.96
LandUse Density	Den Water	0.656285	0.511642	2637
LandUse Density	Den Bingo Hall/Cinema/Conference/Exhibition Centre/Theatre/Concert Hall	0.614929	0.538603	2775.96
LandUse Density	Den Hotel/Motel/Boarding/Guest House	0.52901	0.596799	3075.9
LandUse Density	Den Ancillary Building	0.507416	0.611864	3153.55
LandUse Density	Den Market (Indoor/Outdoor)	0.494983	0.620613	3198.64
LandUse Density	Den Allotment	0.333566	0.738707	3807.3
Note: (P < 0.05/[121 exposures + 2413 brain phenotypes + 39 mental health scores/2 SWB factors ] =9.701e-6)

## Sheet: Supplementary Table 8
Supplementary Table 8: Association between SSWB and urbanization using linear regression.
Group	Name	t_value	p_value	Bonferroni	Num_MC
Air pollution	Nitrogen dioxide air pollution 2010	18.9681	3.69217e-80	1.90295e-76	5146
Air pollution	Particulate matter air pollution pm2.5 absorbance 2010	15.9095	5.92022e-57	3.05128e-53
Air pollution	Nitrogen oxides air pollution 2010	14.7327	4.22074e-49	2.17537e-45
Destination Accessibility	ND University	-14.1722	1.43614e-45	7.40188e-42
Air pollution	Particulate matter air pollution pm2.5 2010	13.2613	4.03991e-40	2.08217e-36
Greenspace proximity	Greenspace percentage buffer 300m	-12.5146	6.42026e-36	3.309e-32
LandUse Density	Den Shop/Showroom	12.2449	1.84128e-34	9.48996e-31
Greenspace proximity	Natural environment percentage buffer 300m	-12.1584	5.3229e-34	2.74342e-30
Destination Accessibility	ND Bingo Hall/Cinema/Conference/Exhibition Centre/Theatre/Concert Hall	-11.5342	9.07949e-31	4.67957e-27
IMD	Index of Multiple Deprivation (England,Scotland,Wales)	11.048	2.28472e-28	1.17755e-24
Destination Accessibility	ND College	-10.3583	3.89466e-25	2.00731e-21
Destination Accessibility	ND Government Service	-10.3555	4.01189e-25	2.06773e-21
Destination Accessibility	ND Bank/Financial Service	-10.1443	3.56119e-24	1.83544e-20
Coast proximity	Distance Euclidean to coast	9.99497	1.62411e-23	8.37068e-20
LandUse Density	Den Restaurant/Cafeteria	9.96456	2.20681e-23	1.13739e-19
Destination Accessibility	ND GP Practice Surgery/Clinic	-9.62307	6.46198e-22	3.33051e-18
Destination Accessibility	Local Government Service	-9.5982	8.22681e-22	4.2401e-18
Destination Accessibility	ND Factory/Manufacturing	-9.56261	1.161e-21	5.98378e-18
Destination Accessibility	ND Ambulance Station	-9.24284	2.42364e-20	1.24915e-16
Destination Accessibility	ND Restaurant/Cafeteria	-9.14936	5.78068e-20	2.97936e-16
LandUse Density	Den Holiday/Campsite	9.00646	2.14676e-19	1.10644e-15
Street network Accessibility	Length	8.9787	2.76842e-19	1.42684e-15
Destination Accessibility	ND Workshop/Light Industrial	-8.8925	6.02473e-19	3.10514e-15
Destination Accessibility	ND Retail Service Agent	-8.72088	2.78173e-18	1.4337e-14
LandUse Density	Den Workshop/Light Industrial	8.66545	4.53125e-18	2.3354e-14
Destination Accessibility	ND Job Centre	-8.6629	4.63361e-18	2.38816e-14
Destination Accessibility	ND Hospital/Hospice	-8.59236	8.5822e-18	4.42327e-14
Street network Accessibility	Network Quantity Penalized for Distance	8.59011	8.76395e-18	4.51694e-14
Destination Accessibility	ND Police/Transport Police Station	-8.46086	2.67234e-17	1.37732e-13
Destination Accessibility	ND Warehouse/Store/Storage Depot	-8.34326	7.27355e-17	3.74879e-13
Destination Accessibility	ND Post Office	-8.03391	9.49405e-16	4.89323e-12
Street network Accessibility	Mean Geometric Length	7.82139	5.25563e-15	2.70875e-11
LandUse Density	Den Retail Service Agent	7.7931	6.5705e-15	3.38644e-11
Destination Accessibility	ND Childrens Nursery/Creche	-7.61	2.75318e-14	1.41899e-10
Air pollution	Particulate matter air pollution pm10 2010	7.38472	1.53387e-13	7.90554e-10
LandUse Density	Den Public House/Bar/Nightclub	7.24652	4.29186e-13	2.21202e-09
Destination Accessibility	ND Public House/Bar/Night Club	-7.12657	1.03259e-12	5.32199e-09
LandUse Density	Den Office/Work Studio	7.06608	1.5991e-12	8.24176e-09
LandUse Density	Den Warehouse/Store/Storage Depot	7.03687	1.9725e-12	1.01663e-08
Destination Accessibility	ND Dentist	-7.01103	2.37336e-12	1.22323e-08
Destination Accessibility	ND Fast Food Outlet/Takeaway(Hot/Cold)	-6.99578	2.64647e-12	1.36399e-08
Street network Accessibility	Convex Hull Area	6.98139	2.93392e-12	1.51214e-08
Destination Accessibility	ND Preparatory/First/Primary/Infant/Junior/M iddle School	-6.85442	7.18156e-12	3.70138e-08
LandUse Density	Den Bank/Financial Service	6.78086	1.19805e-11	6.17476e-08
Street network Accessibility	Links	6.71817	1.84633e-11	9.51598e-08
LandUse Density	Den Residential	6.20493	5.48327e-10	2.82607e-06
LandUse Density	Den Fast Food Outlet/Takeaway(Hot/Cold)	6.05826	1.37855e-09	7.10504e-06
Street network Accessibility	Convex Hull Perimeter	5.86835	4.41021e-09	2.27302e-05
Street network Accessibility	Mean Crow Flight Distance	5.80995	6.26082e-09	3.22683e-05
Destination Accessibility	ND Places of Worship	-5.71593	1.09266e-08	5.63158e-05
LandUse Density	Den Other Licensed Premise/Vendor	5.48875	4.05303e-08	0.000208893
Sound pollution	Average daytime sound level of noise pollution	5.45967	4.7758e-08	0.000246145
Destination Accessibility	ND Public/Village Hall/Other Community Facility	-5.20457	1.94649e-07	0.00100322
LandUse Density	Den Licensed Private Members’ Club	5.13736	2.78898e-07	0.00143744
LandUse Density	Den Bingo Hall/Cinema/Conference/Exhibition Centre/Theatre/Concert Hall	4.81312	1.48702e-06	0.00766412
Street network Accessibility	Betweenness	4.73032	2.24359e-06	0.0115635
Destination Accessibility	ND Secondary/High School	-4.65234	3.28403e-06	0.0169259
Destination Accessibility	ND Mineral/Ore Working/Quarry/Mine	-4.64466	3.40861e-06	0.017568
Destination Accessibility	ND Car/Coach/Commercial Vehicle/Taxi/Parking/Park and Ride Site	-4.50379	6.67901e-06	0.0344236
Traffic	Sum of road length of major roads within 100m	4.36806	1.25419e-05	0.0646408
LandUse Density	Den Indoor Outdoor Leisure Sporting Activity Centre	4.28102	1.86125e-05	0.0959288
LandUse Density	Den Community Services	4.15875	3.2013e-05	0.164995
LandUse Density	Den Education	3.97984	6.89863e-05	0.355555
Destination Accessibility	ND Landfill	3.95444	7.67405e-05	0.39552
Traffic	Total traffic load on major roads	3.85721	0.000114725	0.59129
Traffic	Inverse distance to the nearest major road	3.8512	0.000117579	0.606
Destination Accessibility	ND Recycling	-3.82369	0.000131513	0.677816
LandUse Density	Den Object of Interest	3.80173	0.000143735	0.740812
Street network Accessibility	Convex Hull Max Radius	3.62946	0.000284104	1.46427
LandUse Density	Den Museum Gallery	3.61962	0.000295115	1.52102
LandUse Density	Den Amenity-Open areas not attracting visitors	3.61504	0.000300376	1.54814
LandUse Density	Den Factory/Manufacturing	3.44173	0.000578123	2.97965
Destination Accessibility	ND Library	-3.4012	0.000671048	3.45858
LandUse Density	Den Park	-3.24831	0.00116115	5.98454
Street network Accessibility	Link Connectivity	3.15881	0.00158447	8.16634
LandUse Density	Den Utility	3.04678	0.00231341	11.9233
LandUse Density	Den Storage Land	3.02176	0.00251339	12.954
LandUse Density	Den Maintenance Depot	2.84721	0.00441086	22.7336
LandUse Density	Den Transport	2.76802	0.00564035	29.0703
LandUse Density	Den Military	2.75532	0.00586408	30.2235
Street network Accessibility	Angular Distance	2.71737	0.00658102	33.9186
LandUse Density	Den Information	2.69677	0.00700212	36.0889
Traffic	Close to major road	2.66291	0.00774753	39.9308
Destination Accessibility	ND Fire Station	-2.54326	0.0109831	56.607
Air pollution	Particulate matter air pollution pm2.5 10um 2010	2.49944	0.0124399	64.1153
Traffic	Traffic intensity on the nearest road	2.44154	0.0146257	75.3808
Terrain	Terrain	2.41685	0.0156563	80.6928
LandUse Density	Den Medical	2.38013	0.0173074	89.2022
LandUse Density	Den Farm Non Residential Associated Building	-2.31232	0.0207612	107.003
Traffic	Inverse distance to the nearest road	2.2139	0.0268368	138.317
NDVI	Normalized Difference Vegetation Index	-2.19489	0.0281733	145.205
LandUse Density	Den Library	2.0879	0.0368083	189.71
Building Class	Building Class	-1.94404	0.0518925	267.454
LandUse Density	Den Hotel/Motel/Boarding/Guest House	1.88657	0.0592195	305.217
Street network Accessibility	Convex Hull Shape Index	-1.83985	0.0657914	339.089
LandUse Density	Den Wholesale Distribution	1.81948	0.0688391	354.797
LandUse Density	Den Unused Land	1.75627	0.0790444	407.395
LandUse Density	Den Automated Teller Machine(ATM)	1.67096	0.0947313	488.245
Street network Accessibility	Link Ang Curvature	-1.62405	0.104368	537.912
LandUse Density	Den Ancillary Building	1.36759	0.171442	883.612
Destination Accessibility	ND Water/Waste Water/Sewage Treatment Works	1.09001	0.275709	1421
Traffic	Traffic intensity on the nearest major road	-1.04896	0.2942	1516.31
LandUse Density	Den Water	1.00475	0.315016	1623.59
Street network Accessibility	Mean Angular Distance	-0.976663	0.328737	1694.31
Water proximity	Water percentage buffer 300m	0.958924	0.337598	1739.98
Street network Accessibility	Diversion Ratio	-0.936862	0.348831	1797.88
Destination Accessibility	ND Power Station/Energy Production	-0.883084	0.377192	1944.05
LandUse Density	Den Incinerator/Waste Transfer Station	0.841388	0.400132	2062.28
Street network Accessibility	Link Length	-0.816952	0.413957	2133.53
Greenspace proximity	Domestic garden percentage buffer 300m	-0.787803	0.430813	2220.41
Street network Accessibility	Two Phase Destination assignment	-0.6664	0.505156	2603.58
LandUse Density	Den Mineral/Ore Working/Quarry/Mine	0.66588	0.505489	2605.29
Street network Accessibility	Convex Hull Bearing	-0.585515	0.558202	2876.97
LandUse Density	Den Animal Centre	-0.569279	0.569168	2933.49
LandUse Density	Den Recycling Plant	0.505133	0.613466	3161.8
LandUse Density	Den Petrol Filling Station	0.43748	0.661764	3410.73
LandUse Density	Den Open Space	-0.330681	0.740885	3818.52
LandUse Density	Den Market (Indoor/Outdoor)	-0.289836	0.771942	3978.59
Street network Accessibility	Two Phase Betweenness	0.177416	0.859182	4428.22
LandUse Density	Den Allotment	-0.106091	0.91551	4718.54
LandUse Density	Den Emergency/Rescue Service	0.0234343	0.981304	5057.64
Note: (P < 0.05/[125 exposures + 2413 brain phenotypes + 39 mental health scores/2 SWB factors ] =9.701e-6)

## Sheet: Supplementary Table 9
Supplementary Table 9: CCA weights for ISWB-related urban living environments.
	Group	Name	weight
Urban-1	Destination Accessibility	ND Car/Coach/Commercial Vehicle/Taxi/Parking/Park and Ride Site	0.344824
	Destination Accessibility	ND University	0.323004
	Destination Accessibility	ND Bingo Hall/Cinema/Conference/Exhibition Centre/Theatre/Concert Hall	0.201977
	Destination Accessibility	ND Dentist	0.196705
	Destination Accessibility	ND Secondary/High School	0.1153
	Destination Accessibility	ND Bank/Financial Service	0.0926257
	Destination Accessibility	ND Hospital/Hospice	0.0643511
	Destination Accessibility	ND Retail Service Agent	0.0270675
	Destination Accessibility	ND Warehouse/Store/Storage Depot	0.0183304
	Destination Accessibility	ND Childrens Nursery/Creche	0.0119851
	Street network Accessibility	Link Ang Curvature	0.00173711
	Destination Accessibility	ND Places of Worship	0.00164299
	Destination Accessibility	ND Public House/Bar/Night Club	-0.00835073
	Destination Accessibility	ND Landfill	-0.0120478
	Destination Accessibility	ND Mineral/Ore Working/Quarry/Mine	-0.0261343
	Destination Accessibility	ND Job Centre	-0.0272997
	Destination Accessibility	ND Recycling	-0.0335327
	Destination Accessibility	ND Ambulance Station	-0.0343174
	Destination Accessibility	ND Restaurant/Cafeteria	-0.0492116
	Greenspace proximity	Greenspace percentage buffer 300m	-0.0517978
	Destination Accessibility	ND Library	-0.0609104
	Destination Accessibility	ND GP Practice Surgery/Clinic	-0.0684451
	Destination Accessibility	ND Police/Transport Police Station	-0.0684765
	Destination Accessibility	Local Government Service	-0.0789536
	Destination Accessibility	ND Workshop/Light Industrial	-0.129728
	Destination Accessibility	ND Factory/Manufacturing	-0.149661
	Destination Accessibility	ND Post Office	-0.153484
	Destination Accessibility	ND Power Station/Energy Production	-0.162405
	Destination Accessibility	ND Preparatory/First/Primary/Infant/Junior/M iddle School	-0.189948
	Destination Accessibility	ND Fire Station	-0.190216
	Destination Accessibility	ND Fast Food Outlet/Takeaway(Hot/Cold)	-0.204686
	Destination Accessibility	ND Public/Village Hall/Other Community Facility	-0.208631
	Destination Accessibility	ND Government Service	-0.241941
	Destination Accessibility	ND College	-0.329841
	Greenspace proximity	Natural environment percentage buffer 300m	-0.350587
Urban-2	IMD	Index of Multiple Deprivation (England,Scotland,Wales)	0.888397
	Air pollution	Particulate matter air pollution pm10 2010	0.41847
	Street network Accessibility	Length	0.342379
	Air pollution	Nitrogen dioxide air pollution 2010	0.0982904
	Air pollution	Nitrogen oxides air pollution 2010	0.0793707
	LandUse Density	Den Fast Food Outlet/Takeaway(Hot/Cold)	0.0676779
	LandUse Density	Den Amenity-Open areas not attracting visitors	0.0635679
	Sound pollution	Average daytime sound level of noise pollution	0.0575638
	LandUse Density	Den Warehouse/Store/Storage Depot	0.0572789
	LandUse Density	Den Workshop/Light Industrial	0.0541568
	LandUse Density	Den Information	0.0414867
	LandUse Density	Den Petrol Filling Station	0.0404999
	Traffic	Inverse distance to the nearest major road	0.0395761
	LandUse Density	Den Storage Land	0.0394893
	LandUse Density	Den Community Services	0.0319492
	Street network Accessibility	Mean Geometric Length	0.0239566
	LandUse Density	Den Licensed Private Members’ Club	0.0230336
	LandUse Density	Den Library	0.0225896
	LandUse Density	Den Bank/Financial Service	0.0167994
	LandUse Density	Den Other Licensed Premise/Vendor	0.0161868
	LandUse Density	Den Medical	0.0146016
	Street network Accessibility	Betweenness	0.0112304
	LandUse Density	Den Education	0.0108854
	Street network Accessibility	Diversion Ratio	0.00704855
	LandUse Density	Den Retail Service Agent	-0.0089684
	LandUse Density	Den Factory/Manufacturing	-0.00959096
	LandUse Density	Den Automated Teller Machine(ATM)	-0.0109105
	Street network Accessibility	Link Length	-0.0131221
	Street network Accessibility	Angular Distance	-0.0133946
	LandUse Density	Den Shop/Showroom	-0.0215205
	Street network Accessibility	Mean Angular Distance	-0.0223544
	LandUse Density	Den Restaurant/Cafeteria	-0.0265225
	Traffic	Total traffic load on major roads	-0.0282513
	LandUse Density	Den Farm Non Residential Associated Building	-0.0303544
	Air pollution	Particulate matter air pollution pm2.5 absorbance 2010	-0.0431001
	LandUse Density	Den Public House/Bar/Nightclub	-0.0651391
	Street network Accessibility	Two Phase Destination assignment	-0.0709901
	Traffic	Sum of road length of major roads within 100m	-0.0762412
	Street network Accessibility	Links	-0.0877105
	Air pollution	Particulate matter air pollution pm2.5 2010	-0.122027
	Street network Accessibility	Convex Hull Area	-0.135729
	Street network Accessibility	Network Quantity Penalized for Distance	-0.183164
	Air pollution	Particulate matter air pollution pm2.5 10um 2010	-0.271329

## Sheet: Supplementary Table 10
Supplementary Table 10: CCA weights for SSWB-related urban living environments.
	Group	Name	weight
Urban-1	Destination Accessibility	ND Secondary/High School	0.382947
	Destination Accessibility	ND Dentist	0.273799
	Destination Accessibility	ND Car/Coach/Commercial Vehicle/Taxi/Parking/Park and Ride Site	0.176685
	Destination Accessibility	ND Fast Food Outlet/Takeaway(Hot/Cold)	0.123771
	Destination Accessibility	ND Childrens Nursery/Creche	0.0711769
	Destination Accessibility	ND Job Centre	0.0526449
	Destination Accessibility	ND Public/Village Hall/Other Community Facility	0.0432758
	Destination Accessibility	ND Retail Service Agent	0.0294665
	Destination Accessibility	ND Hospital/Hospice	-0.000827281
	Destination Accessibility	ND Places of Worship	-0.00204172
	Destination Accessibility	ND Warehouse/Store/Storage Depot	-0.0118507
	Destination Accessibility	ND Police/Transport Police Station	-0.0322679
	Destination Accessibility	ND College	-0.0329054
	Destination Accessibility	ND Preparatory/First/Primary/Infant/Junior/M iddle School	-0.0347823
	Destination Accessibility	ND Government Service	-0.0399193
	Destination Accessibility	ND GP Practice Surgery/Clinic	-0.0456811
	Destination Accessibility	ND Restaurant/Cafeteria	-0.0930091
	Greenspace proximity	Natural environment percentage buffer 300m	-0.0961531
	Destination Accessibility	ND Ambulance Station	-0.104315
	Destination Accessibility	ND Public House/Bar/Night Club	-0.108913
	Destination Accessibility	ND Mineral/Ore Working/Quarry/Mine	-0.113008
	Destination Accessibility	ND Factory/Manufacturing	-0.11646
	Destination Accessibility	Local Government Service	-0.116822
	Destination Accessibility	ND Workshop/Light Industrial	-0.143845
	Destination Accessibility	ND Post Office	-0.165034
	Destination Accessibility	ND Bank/Financial Service	-0.179457
	Destination Accessibility	ND Bingo Hall/Cinema/Conference/Exhibition Centre/Theatre/Concert Hall	-0.18359
	Greenspace proximity	Greenspace percentage buffer 300m	-0.31807
	Destination Accessibility	ND University	-0.559449
Urban-2	Air pollution	Nitrogen dioxide air pollution 2010	1.10119
	Street network Accessibility	Length	0.423536
	Coast proximity	Distance Euclidean to coast	0.327314
	LandUse Density	Den Shop/Showroom	0.258897
	IMD	Index of Multiple Deprivation (England,Scotland,Wales)	0.248879
	LandUse Density	Den Holiday/Campsite	0.147447
	LandUse Density	Den Workshop/Light Industrial	0.147328
	Street network Accessibility	Mean Crow Flight Distance	0.127495
	LandUse Density	Den Licensed Private Members’ Club	0.0902804
	Sound pollution	Average daytime sound level of noise pollution	0.0819052
	LandUse Density	Den Residential	0.056621
	LandUse Density	Den Warehouse/Store/Storage Depot	0.0307918
	Air pollution	Particulate matter air pollution pm2.5 absorbance 2010	0.0301603
	LandUse Density	Den Retail Service Agent	0.0174456
	LandUse Density	Den Bingo Hall/Cinema/Conference/Exhibition Centre/Theatre/Concert Hall	0.0165529
	LandUse Density	Den Public House/Bar/Nightclub	0.0133479
	LandUse Density	Den Restaurant/Cafeteria	-0.00142703
	LandUse Density	Den Other Licensed Premise/Vendor	-0.00773792
	LandUse Density	Den Bank/Financial Service	-0.0252047
	LandUse Density	Den Office/Work Studio	-0.0279074
	LandUse Density	Den Fast Food Outlet/Takeaway(Hot/Cold)	-0.0299099
	Street network Accessibility	Mean Geometric Length	-0.0319786
	Street network Accessibility	Convex Hull Area	-0.0324087
	Air pollution	Particulate matter air pollution pm10 2010	-0.0574721
	Street network Accessibility	Convex Hull Perimeter	-0.0729553
	Street network Accessibility	Network Quantity Penalized for Distance	-0.0867565
	Street network Accessibility	Links	-0.154479
	Street network Accessibility	Betweenness	-0.185955
	Air pollution	Particulate matter air pollution pm2.5 2010	-0.209186
	Air pollution	Nitrogen oxides air pollution 2010	-0.457341

[truncated: 13 more sheets: Supplementary Table 11, Supplementary Table 12, Supplementary Table 13, Supplementary Table 14, Supplementary Table 15, Supplementary Table 16, Supplementary Table 17, Supplementary Table 18, Supplementary Table 19, Supplementary Table 20, Supplementary Table 21, Supplementary Table 22, Supplementary Table 23]
