# Supplementary material for: Subjective Well-being: A Key to Bridge Urbanization, Brain and Mental Health
Source: Research Square preprint supplement (doi:10.21203/rs.3.rs-5794364/v1), 2025-02-10
Supplement: Supplementary file 2 [file a1b4df5628ba963080d496fc.docx]

Supplementary Information

Subjective Well-being: A Key to Bridge Urbanization, Brain and Mental Health

Running Title: Linking SWB with Urbanization, Brain and Mental Health

Zhen Zhao1, #, Luli Wei1, #, Liyuan Lin1, #, Xin Li1, #, Yingying Xie1,3, Yu Zhang1,4, Feng Zhao1, Nana Liu1, Haoyang Dong1, Mengge Liu1, Yayuan Chen1, Yujie Zhang1, Qiyu Zhao1, Yun Luo1, Qiqi Dong1, Xue Zhang1, Xinglong Fu1, Yu Liu1, Meng Liang1,2, Jiayuan Xu1, Hao Ding1,2*, Chunshui Yu1,2*, Wen Qin1,*

1 Department of Radiology, Tianjin Key Lab of Functional Imaging, Tianjin Institute of Radiology and State Key Laboratory of Experimental Hematology, Tianjin Medical University General Hospital, Tianjin 300052, China

2 School of Medical Imaging, Tianjin Medical University, Tianjin 300070, China

3Department of Radiology, The First Affiliated Hospital of Fujian Medical University, Fuzhou, Fujian 350005, China

4Department of Radiology, Beijing Friendship Hospital, Capital Medical University, Beijing 100050, China

# These authors contributed equally to the work.

* **Correspondence should be addressed:** Wen Qin, Email: [wayne.wenqin@gmail.com](mailto:wayne.wenqin@gmail.com); Chunshui Yu, Email: [chunshui@tmu.edu.cn](mailto:chunshui@tmu.edu.cn); Hao Ding, Email: [dhhere2005@163.com](mailto:dhhere2005@163.com). Department of Radiology, Tianjin Key Lab of Functional Imaging & Tianjin Institute of Radiology, Tianjin Medical University General Hospital. Anshan Road No 154, Heping District, Tianjin 300052, China. Phone: +862260655697.

**List of Supplementary Figures**

**Supplementary Figure 1.** Quality control flowchart.

**Supplementary Figure 2.** The scores of ISWB and SSWB. A-B, SWB score after EFA; C-D, SWB score after Gaussian substitution.

**Supplementary Figure 3.** ROI analysis based on automatic segmentation volume of imaging. VentralDC, Ventral diencephalon.

**Supplementary Figure 4.** The whole brain analysis based on automatic segmentation volume of imaging.

Supplementary Figures


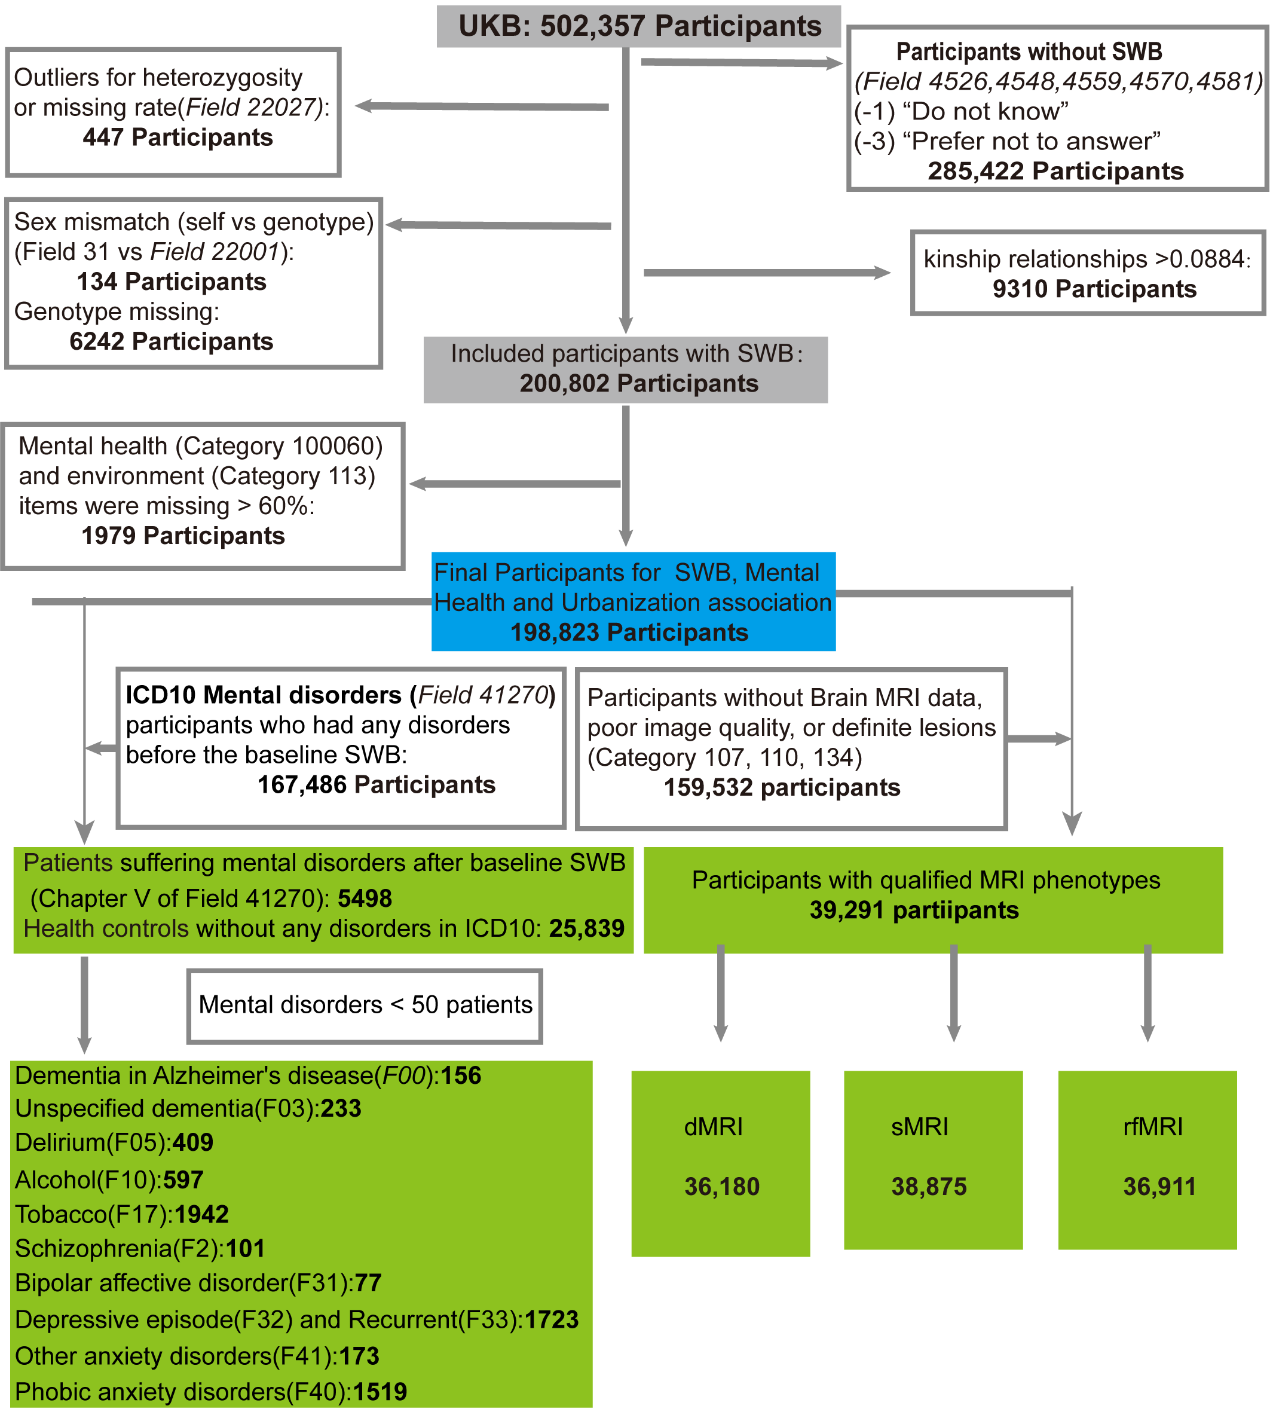


**Supplementary Figure 1.** Quality control flowchart.

Gaussian resampling


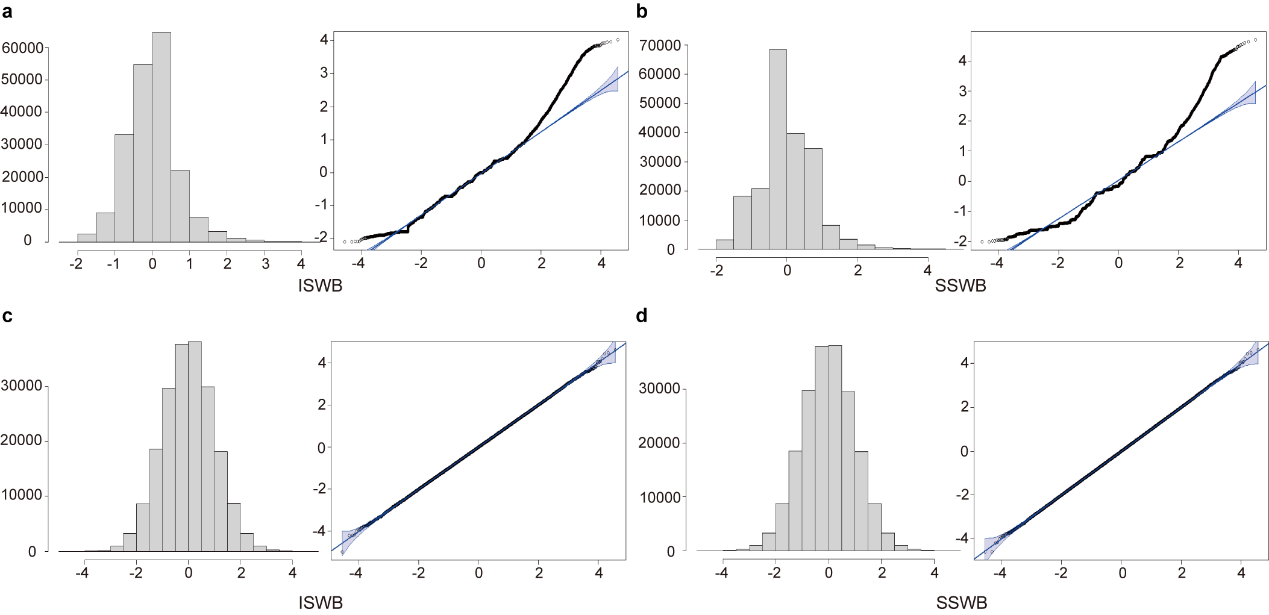


**Supplementary Figure 2.** The scores of ISWB and SSWB. a-b, SWB score after EFA; c-d, SWB score after Gaussian substitution.


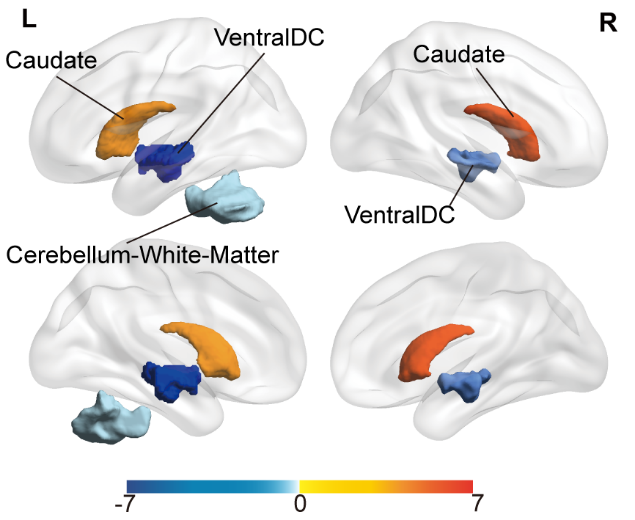


**Supplementary Figure 3.** ROI analysis based on automatic segmentation volume of imaging. VentralDC, Ventral diencephalon.


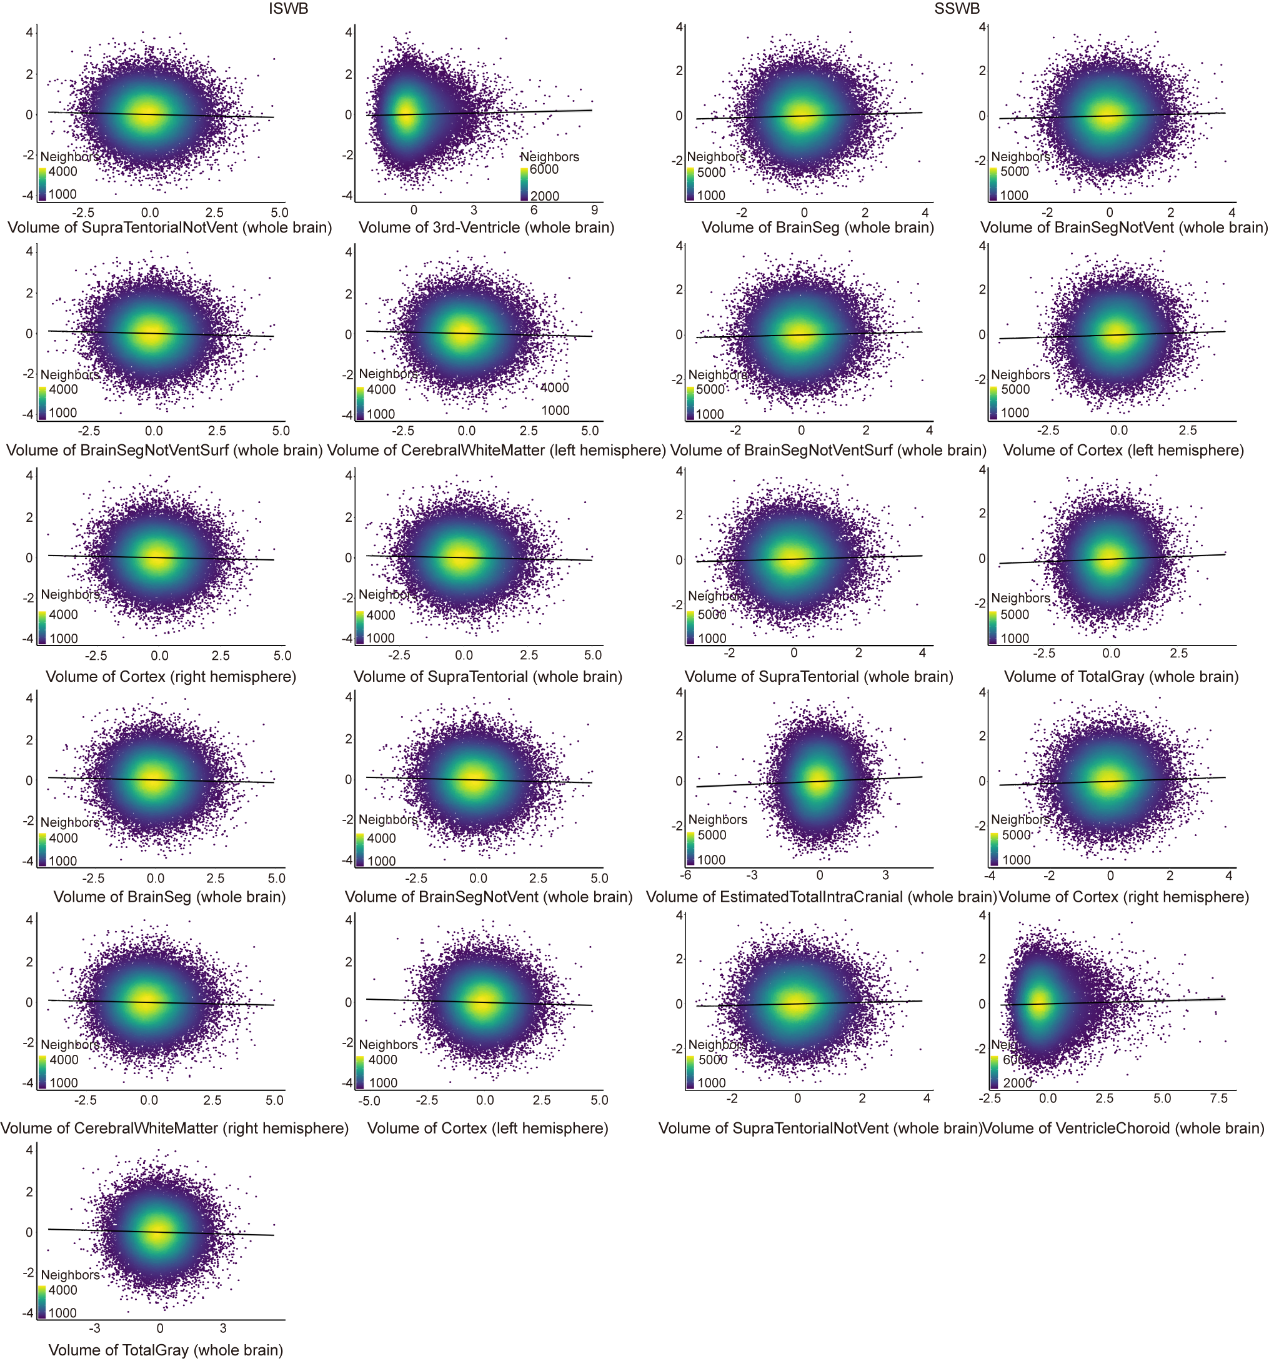


**Supplementary Figure 4.** The whole brain analysis based on automatic segmentation volume of imaging.
